# Supplementary material for: f-Block complexes of a m-terphenyl dithiocarboxylate ligand
Source: Royal Society of Chemistry journal article supplement (doi:10.1039/c7dt04073c), 2017-11-27
Supplement: c7dt04073c1.pdf [file c7dt04073c1.pdf]

**f-Block complexes of a *m*-terphenyl dithiocarboxylate ligand**

Michael A. Boreen, Bernard F. Parker, Stephan Hohloch, Brighton Skeel, and John Arnold\*

*Department of Chemistry, University of California, Berkeley, and Chemical Sciences Division,  
Lawrence Berkeley Laboratory, Berkeley, California 94720, United States*

E-mail: [arnold@berkeley.edu](mailto:arnold@berkeley.edu)

**Supporting Information**

|                               |         |
|-------------------------------|---------|
| NMR Spectra                   | S2–S19  |
| Electrochemistry Data         | S20–S21 |
| X-ray Crystallographic Tables | S22–S26 |

# NMR Spectra

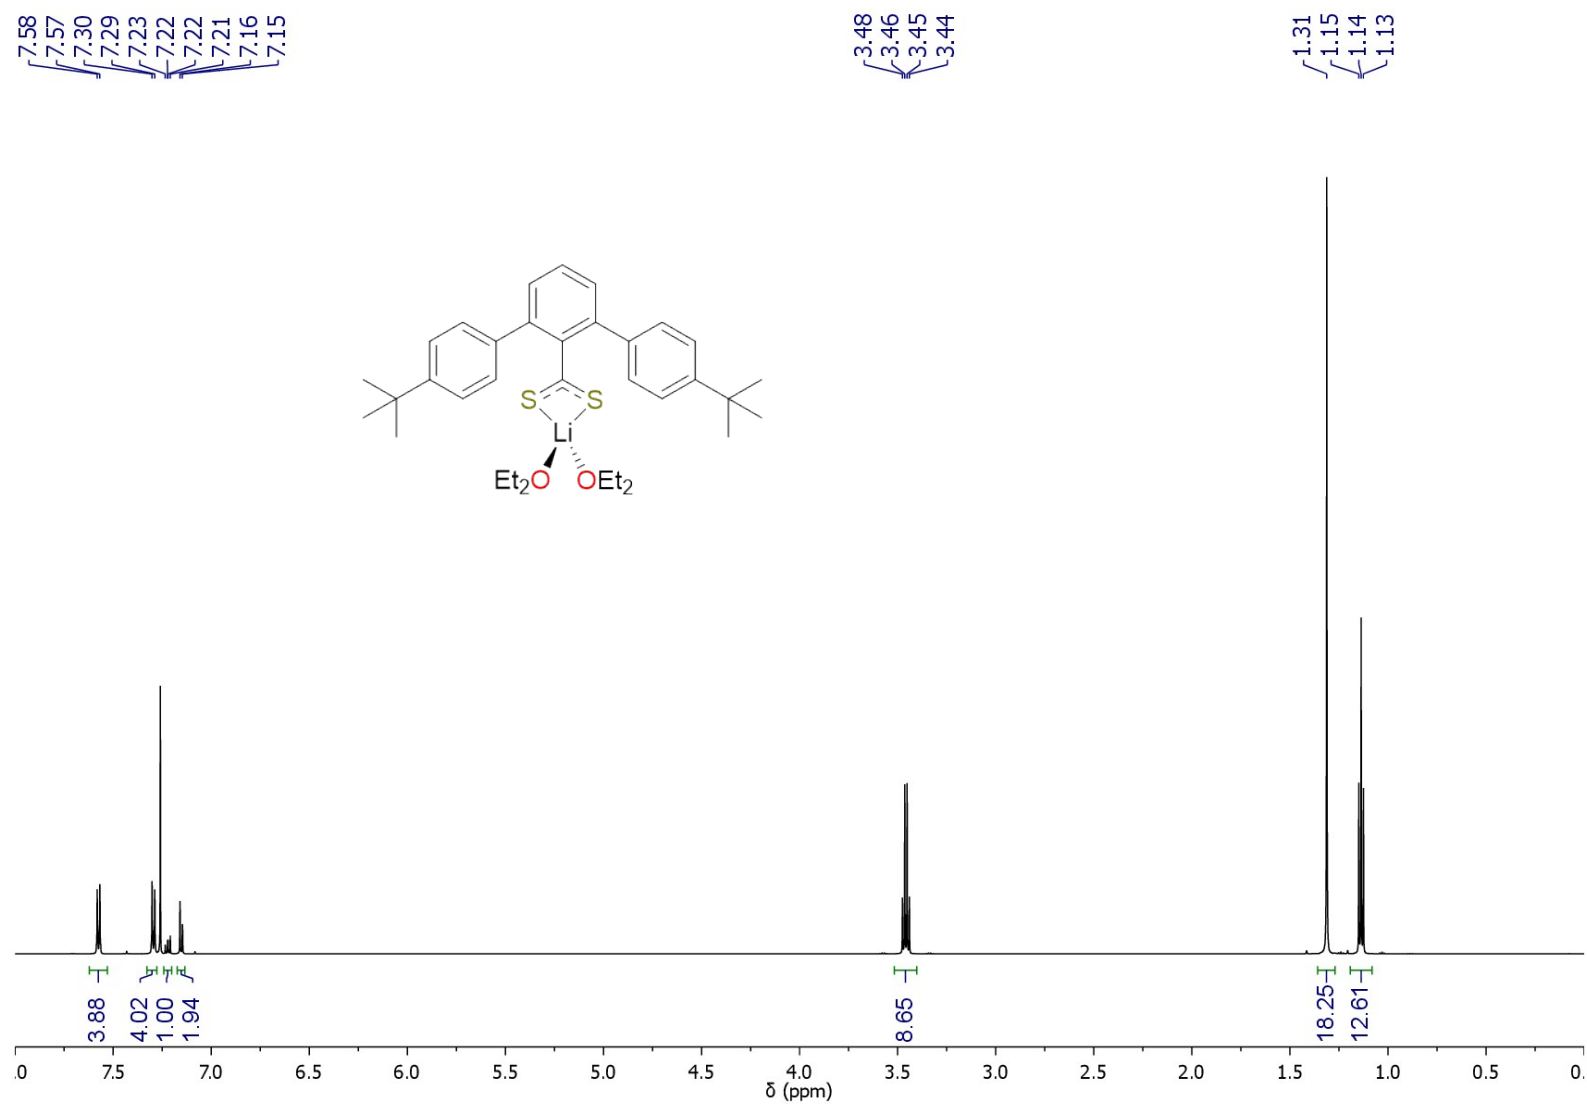

**Figure S1.** <sup>1</sup>H NMR spectrum of **1**·Et<sub>2</sub>O in CDCl<sub>3</sub>

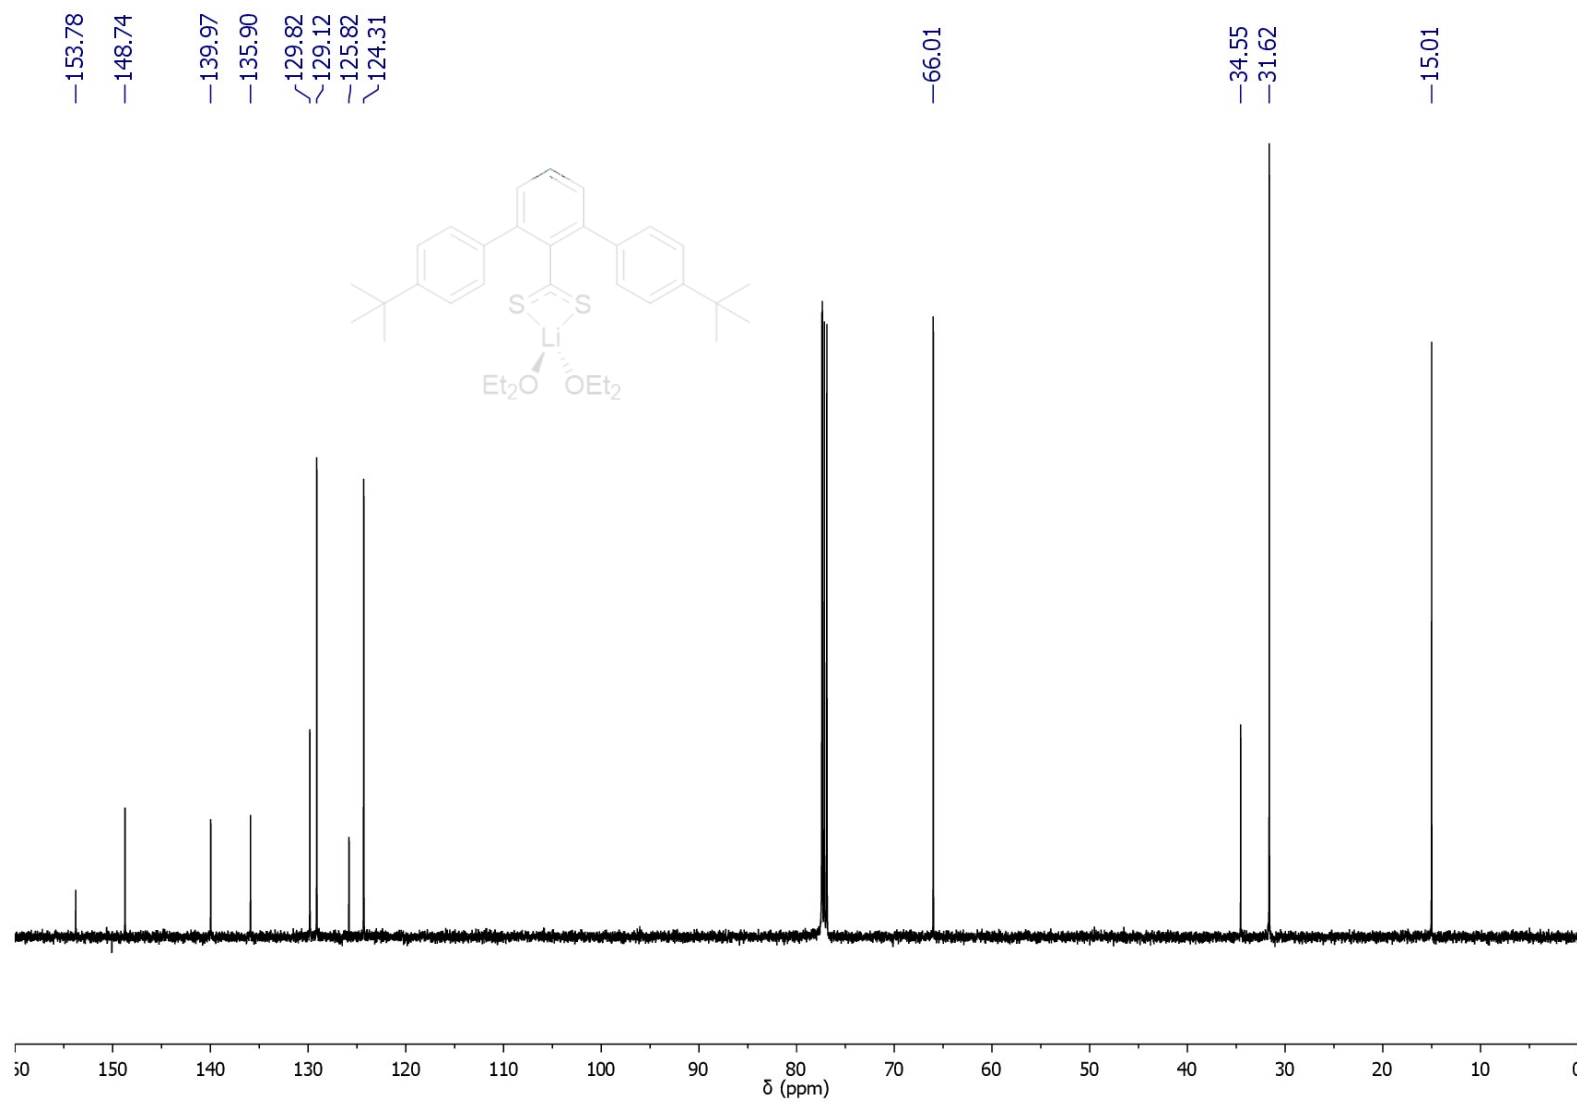

**Figure S2.**  $^{13}\text{C}$  NMR spectrum of  $\mathbf{1} \cdot \text{Et}_2\text{O}$  in  $\text{CDCl}_3$

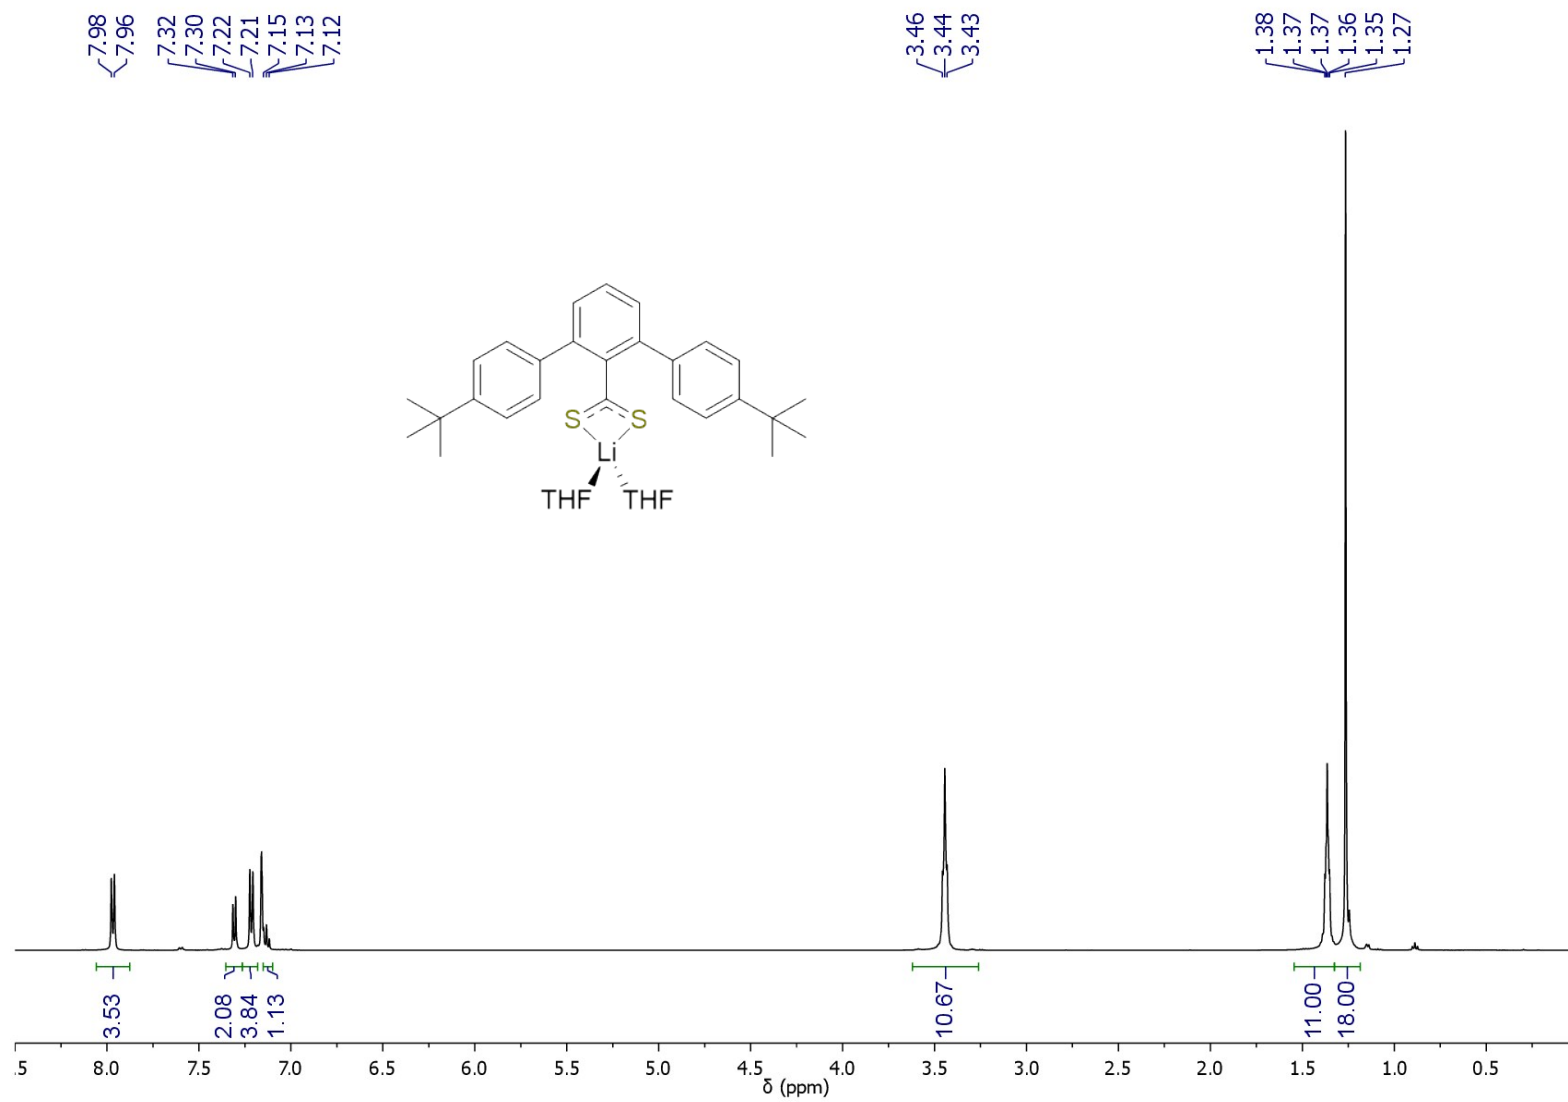

**Figure S3.** <sup>1</sup>H NMR spectrum of **1**·THF in C<sub>6</sub>D<sub>6</sub>

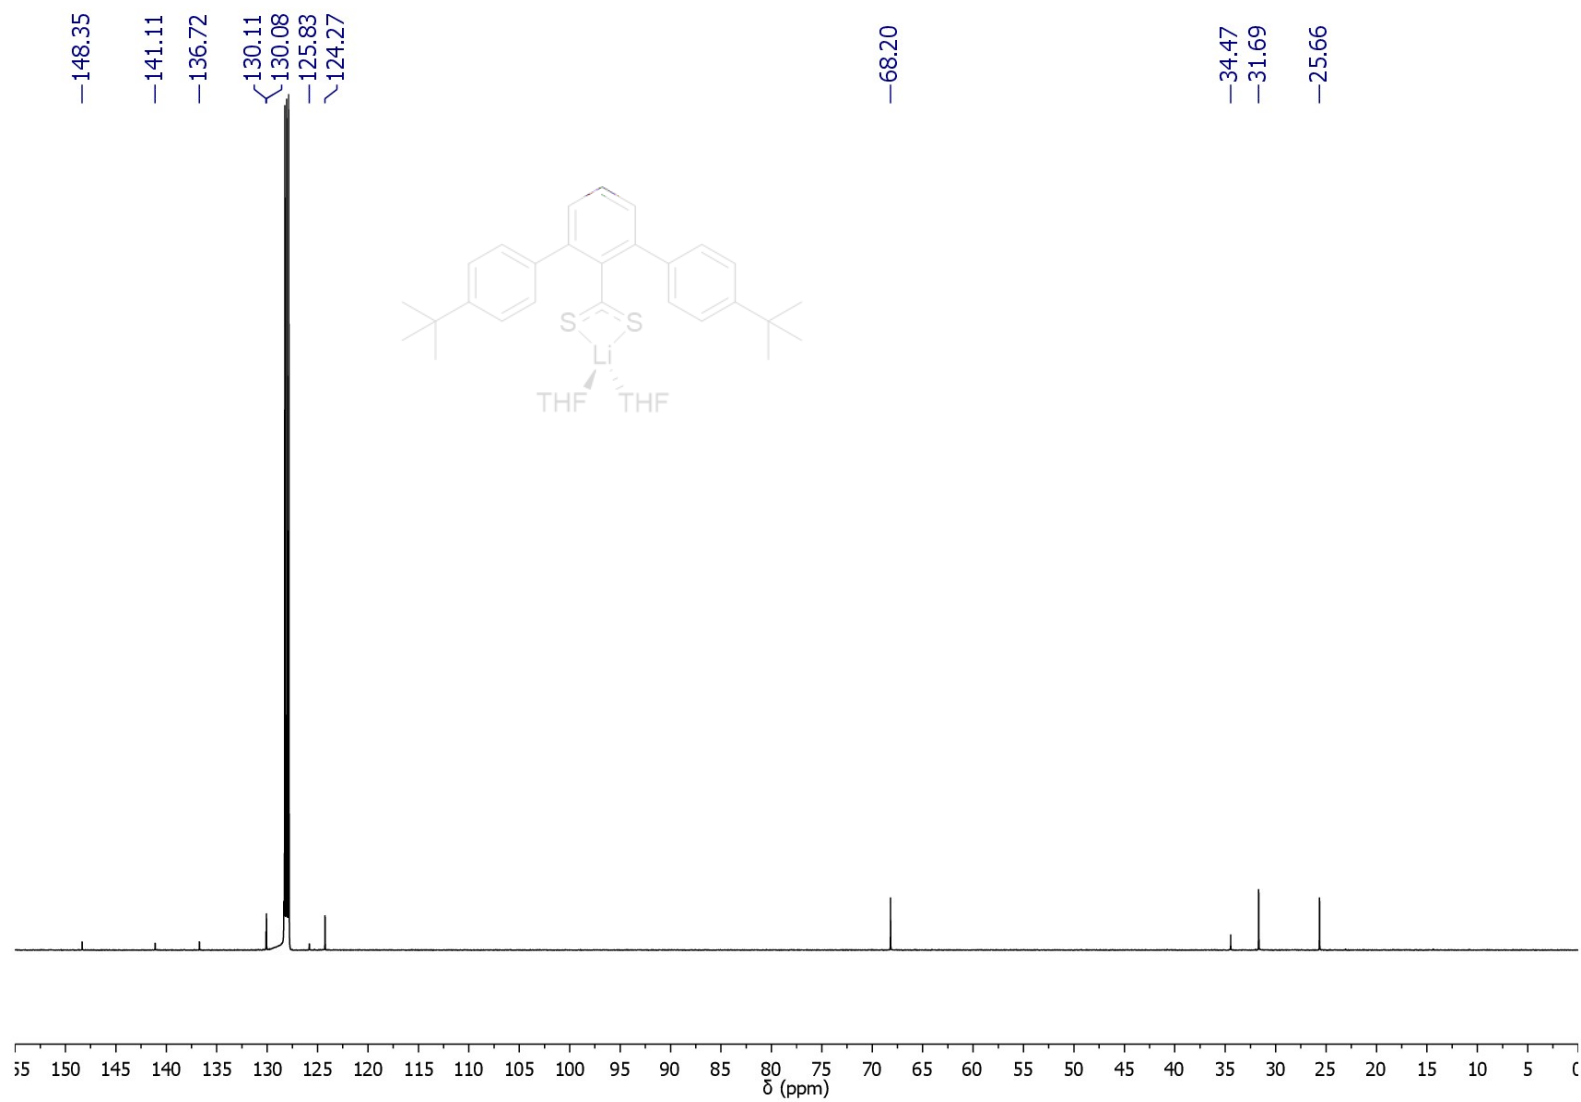

**Figure S4.**  $^{13}\text{C}$  NMR spectrum of **1**·THF in  $\text{C}_6\text{D}_6$

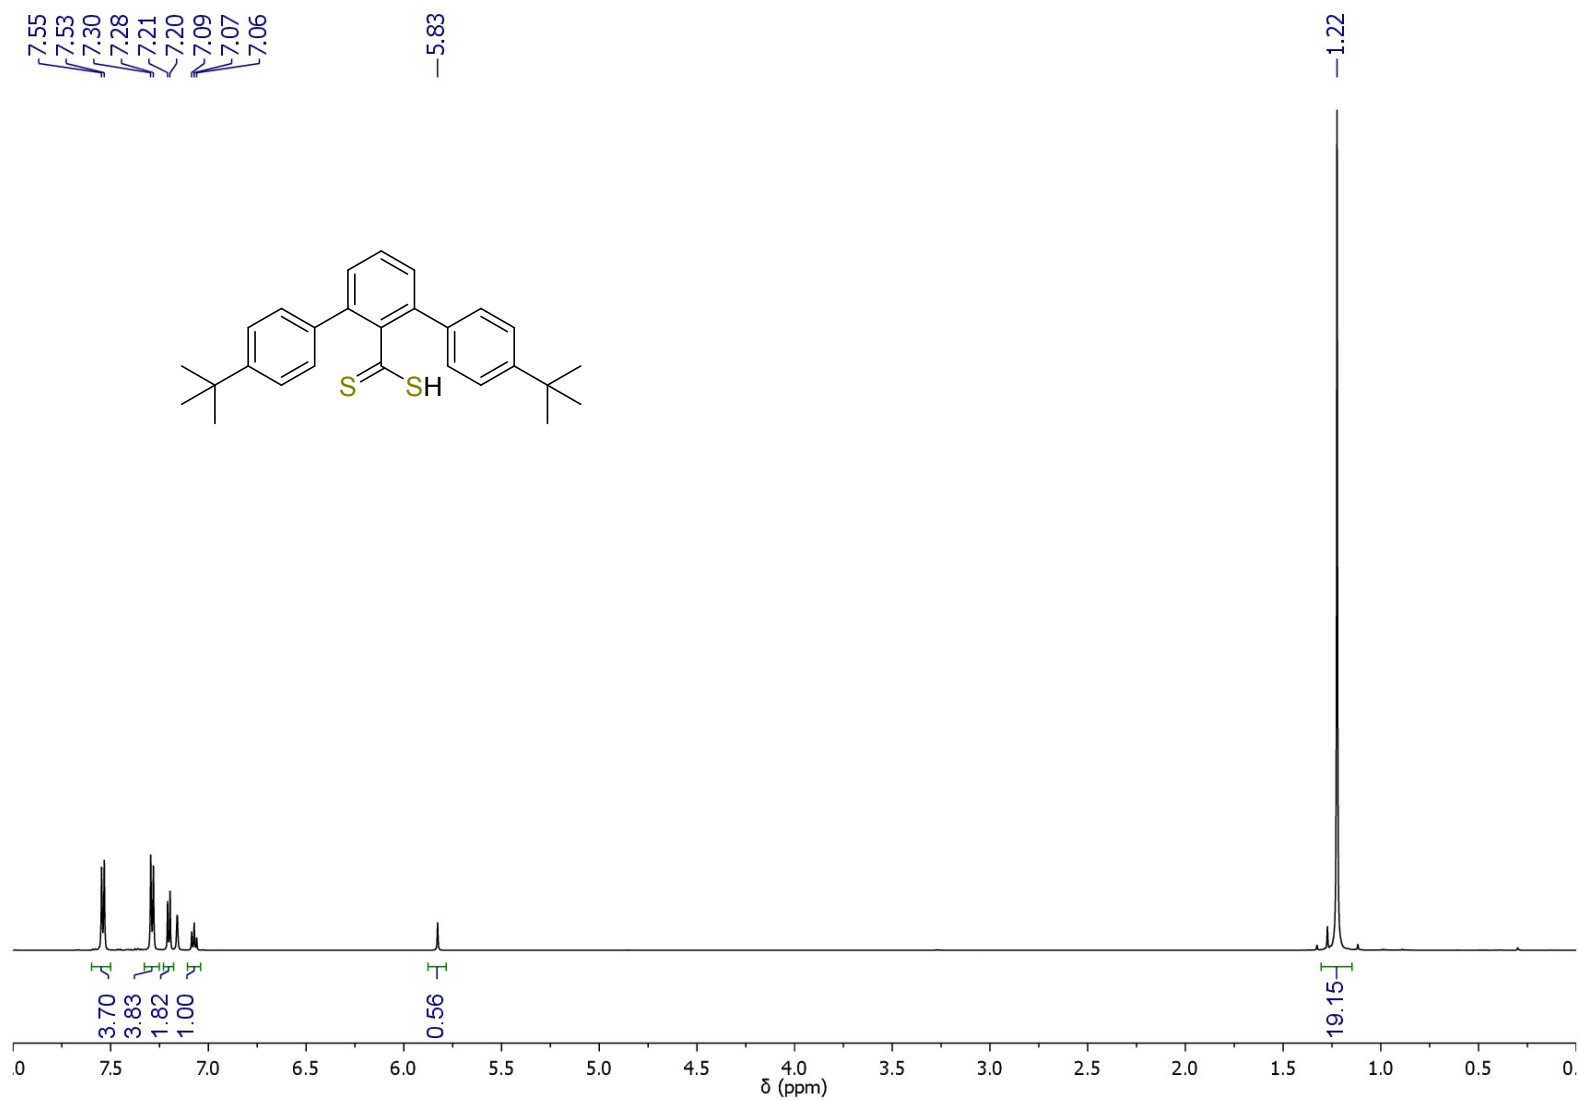

**Figure S5.** <sup>1</sup>H NMR spectrum of **2** in C<sub>6</sub>D<sub>6</sub>

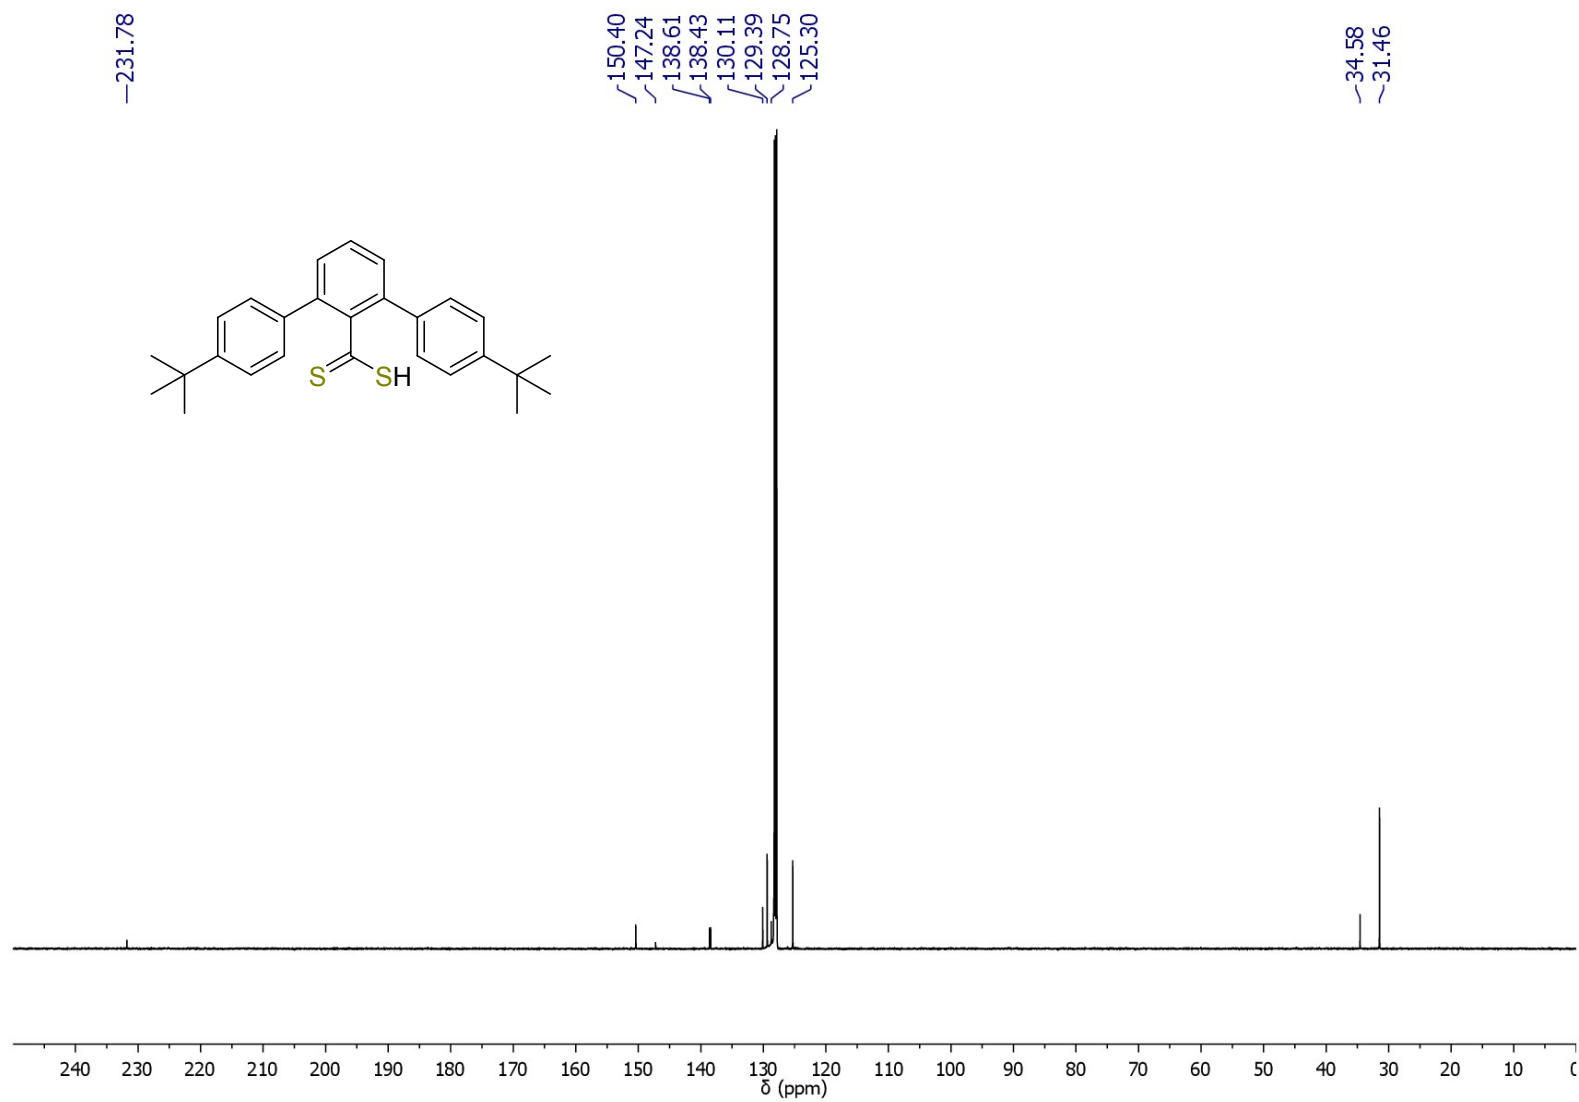

**Figure S6.**  $^{13}\text{C}$  NMR spectrum of **2** in  $\text{C}_6\text{D}_6$

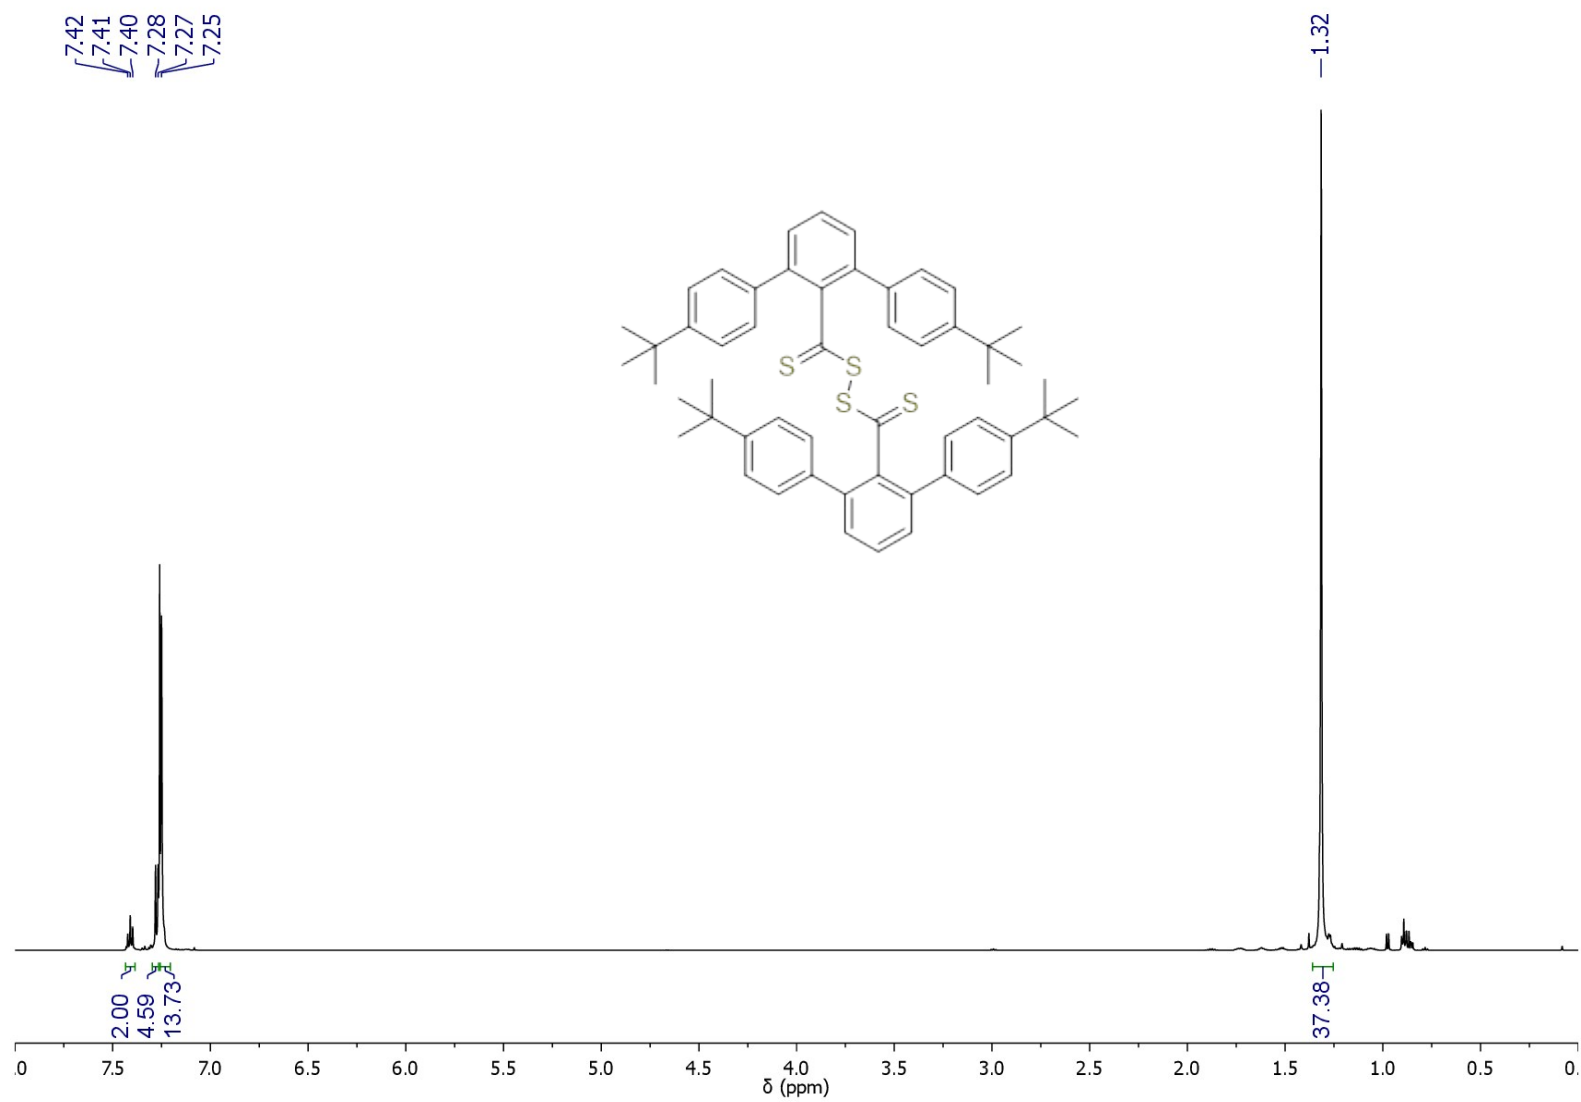

**Figure S7.**  $^1\text{H}$  NMR spectrum of **3** in  $\text{CDCl}_3$





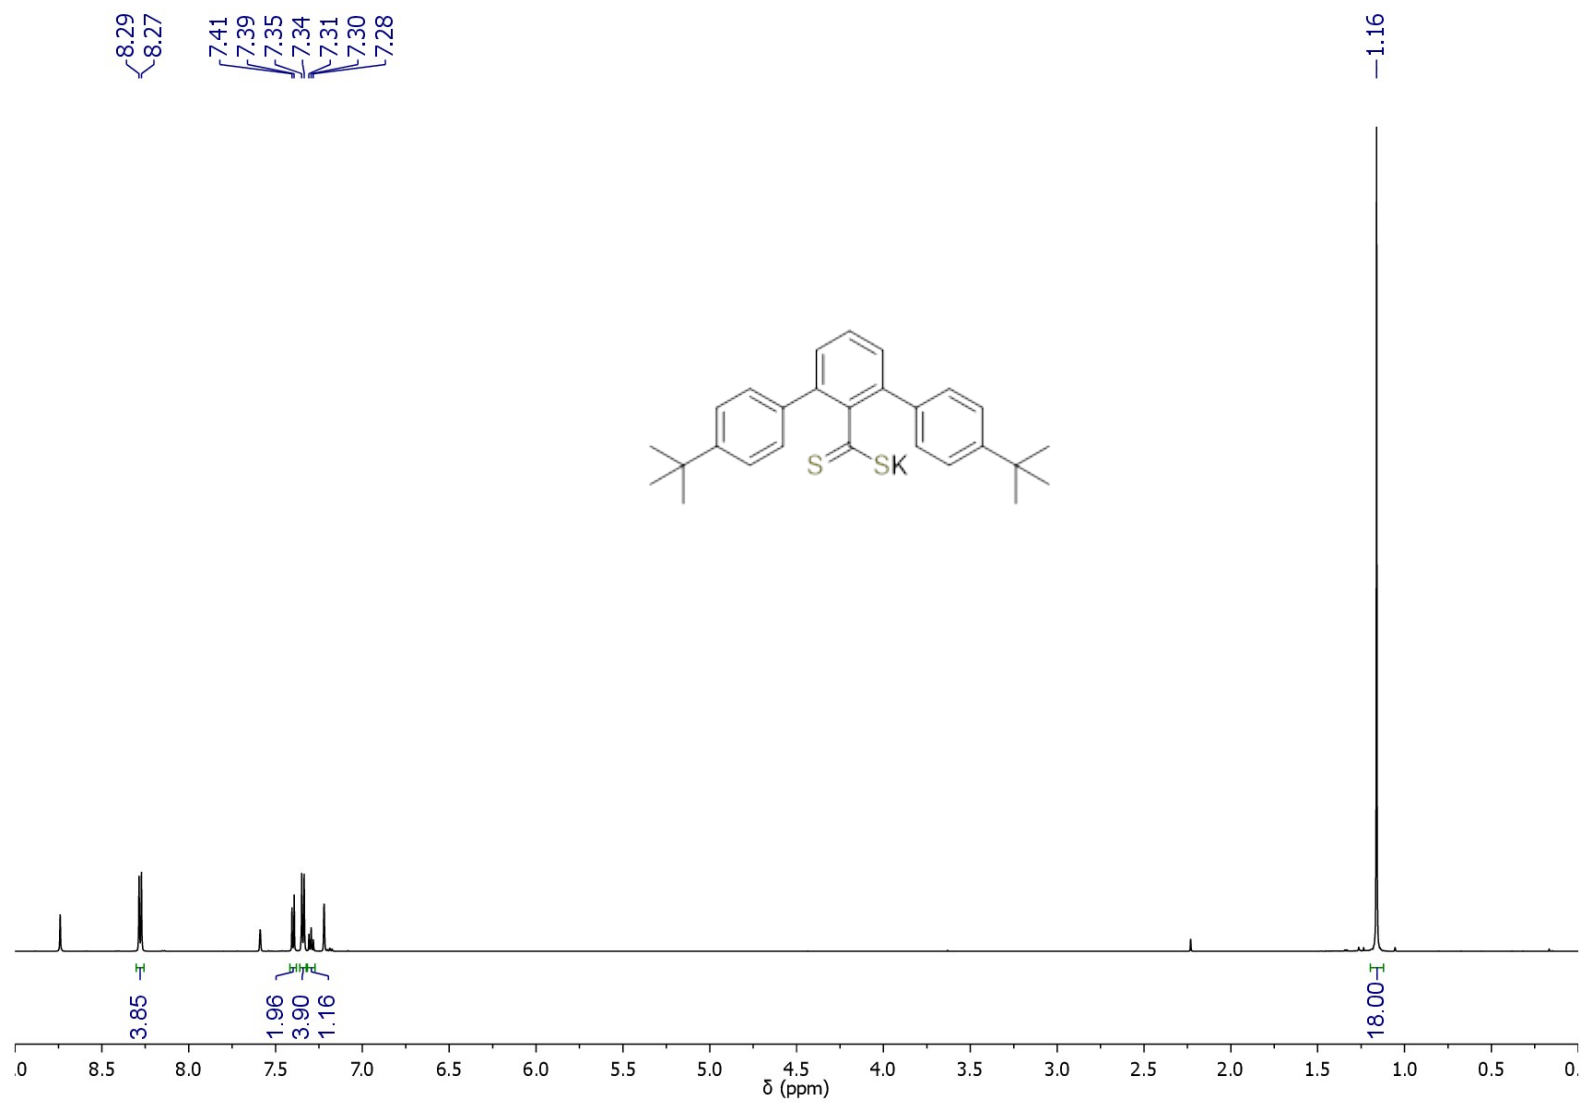

**Figure S9.**  $^1\text{H}$  NMR spectrum of **4** in pyridine- $\text{d}_5$

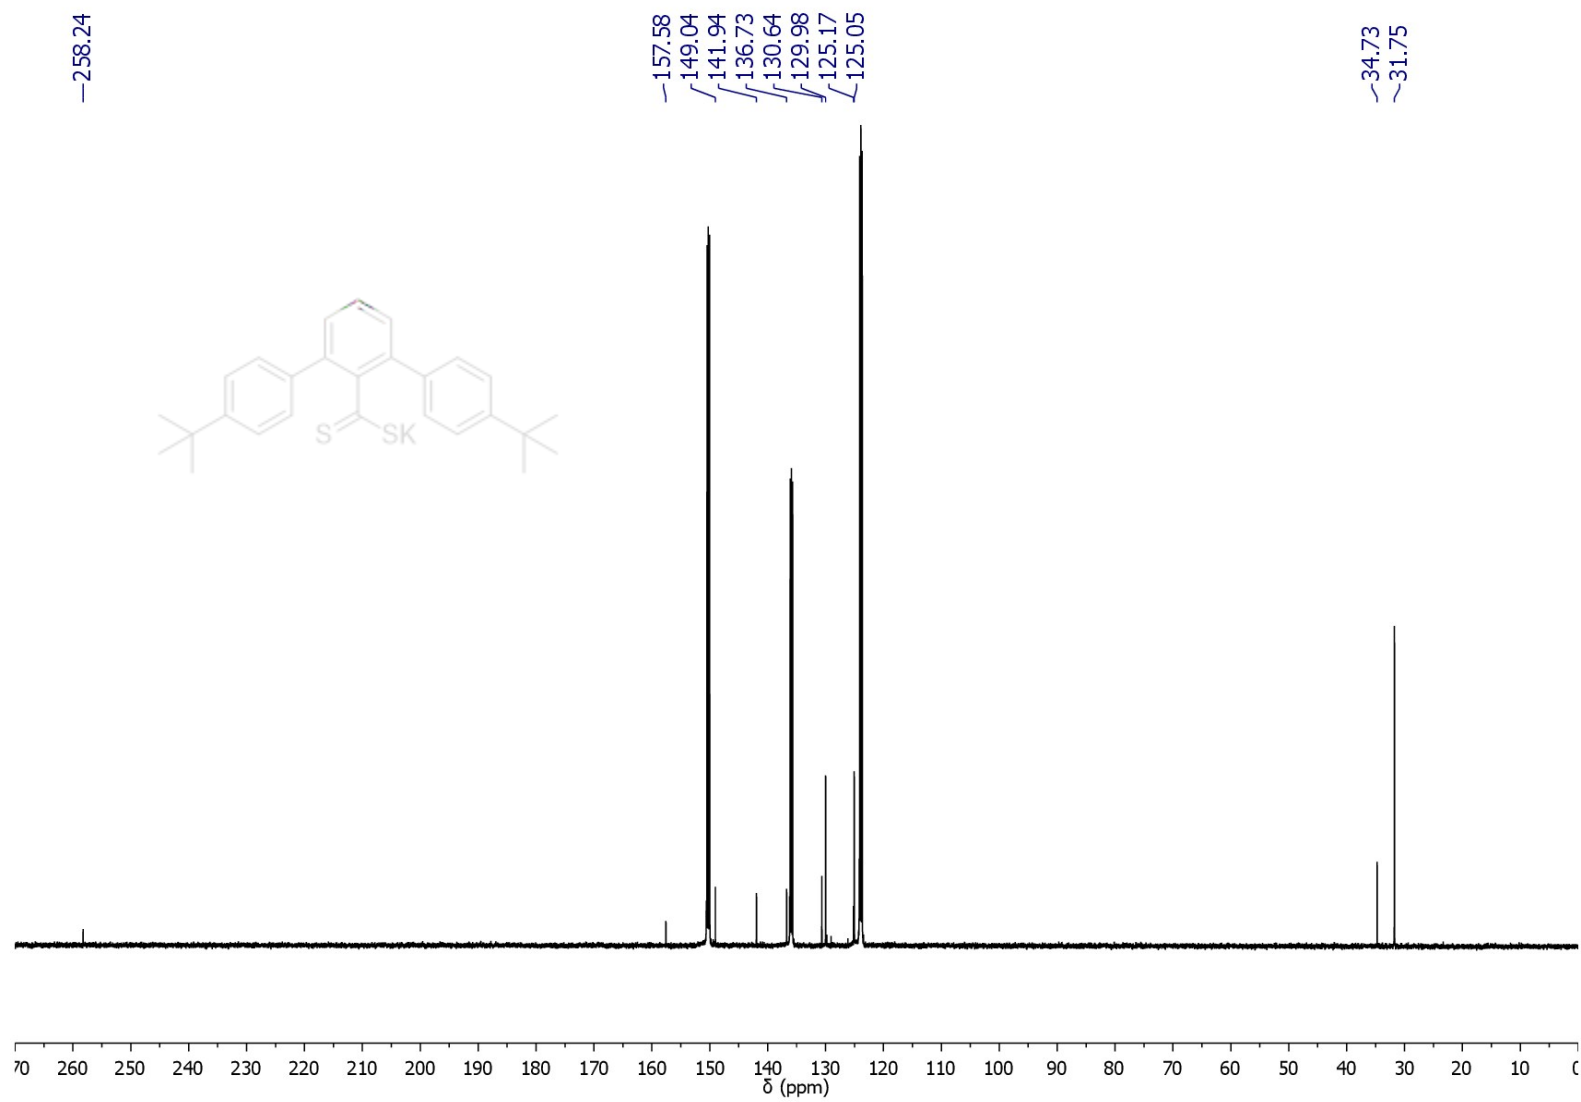

**Figure S10.**  $^{13}\text{C}$  NMR spectrum of **4** in  $\text{pyridine-d}_5$

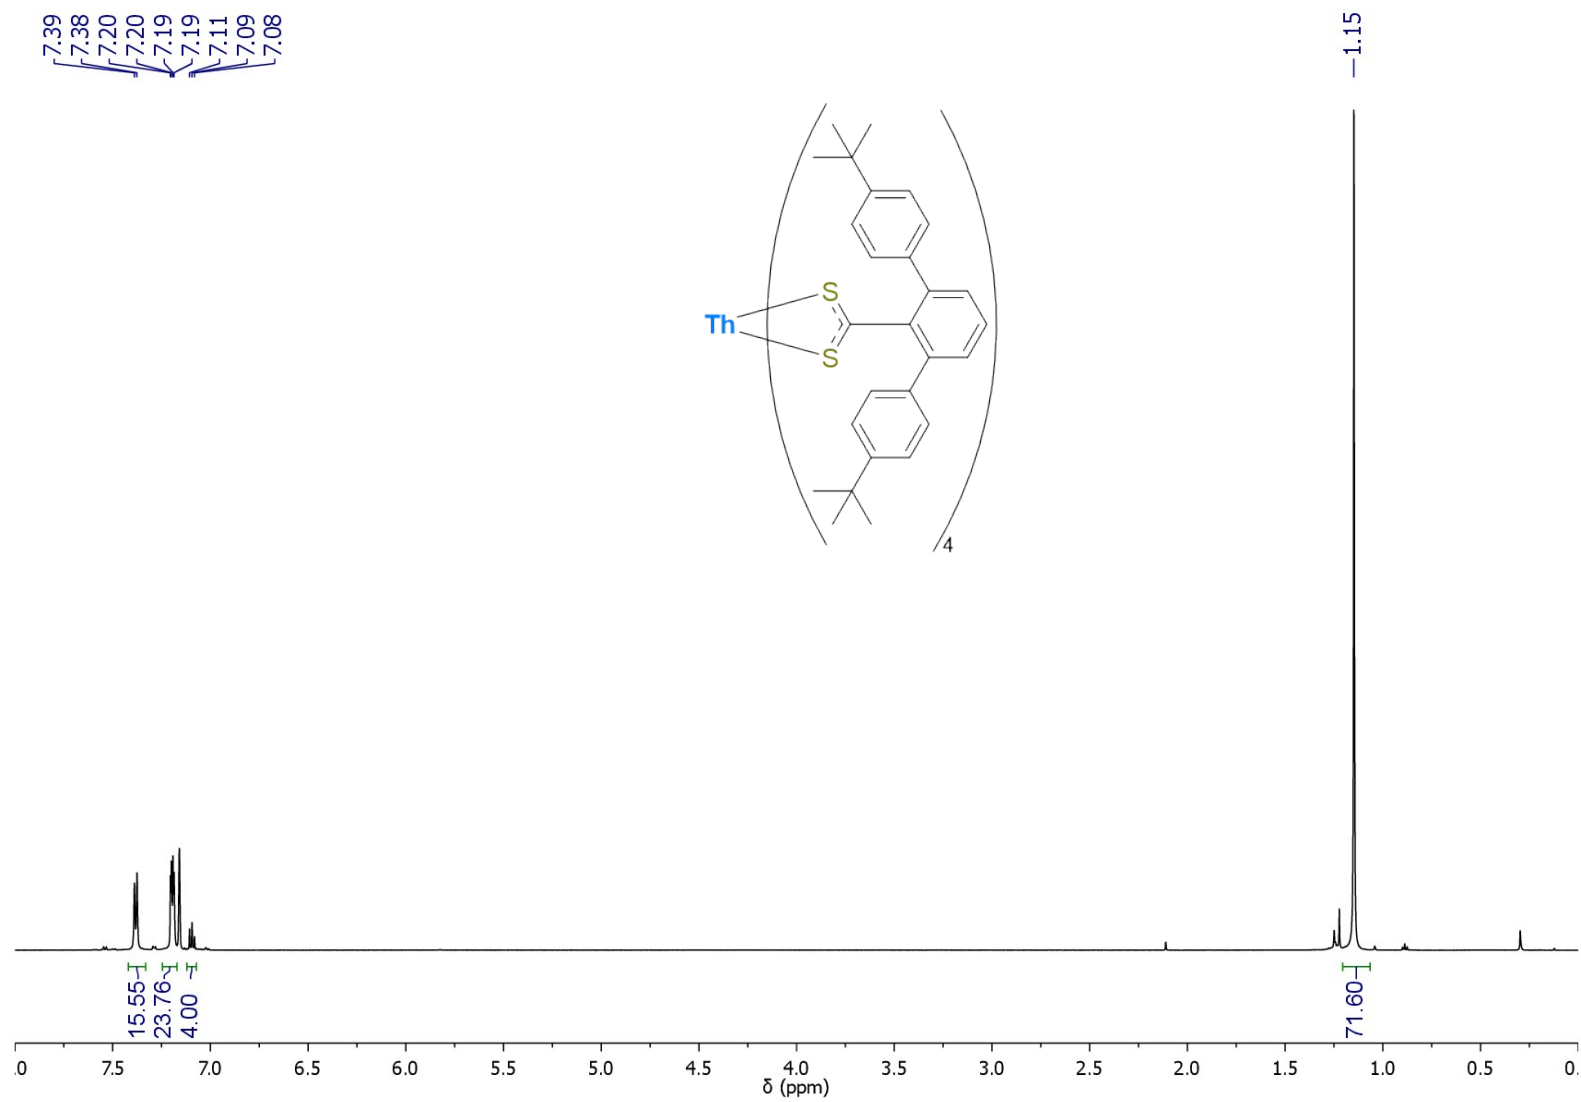

**Figure S11.**  $^1\text{H}$  NMR spectrum of **5** in  $\text{C}_6\text{D}_6$

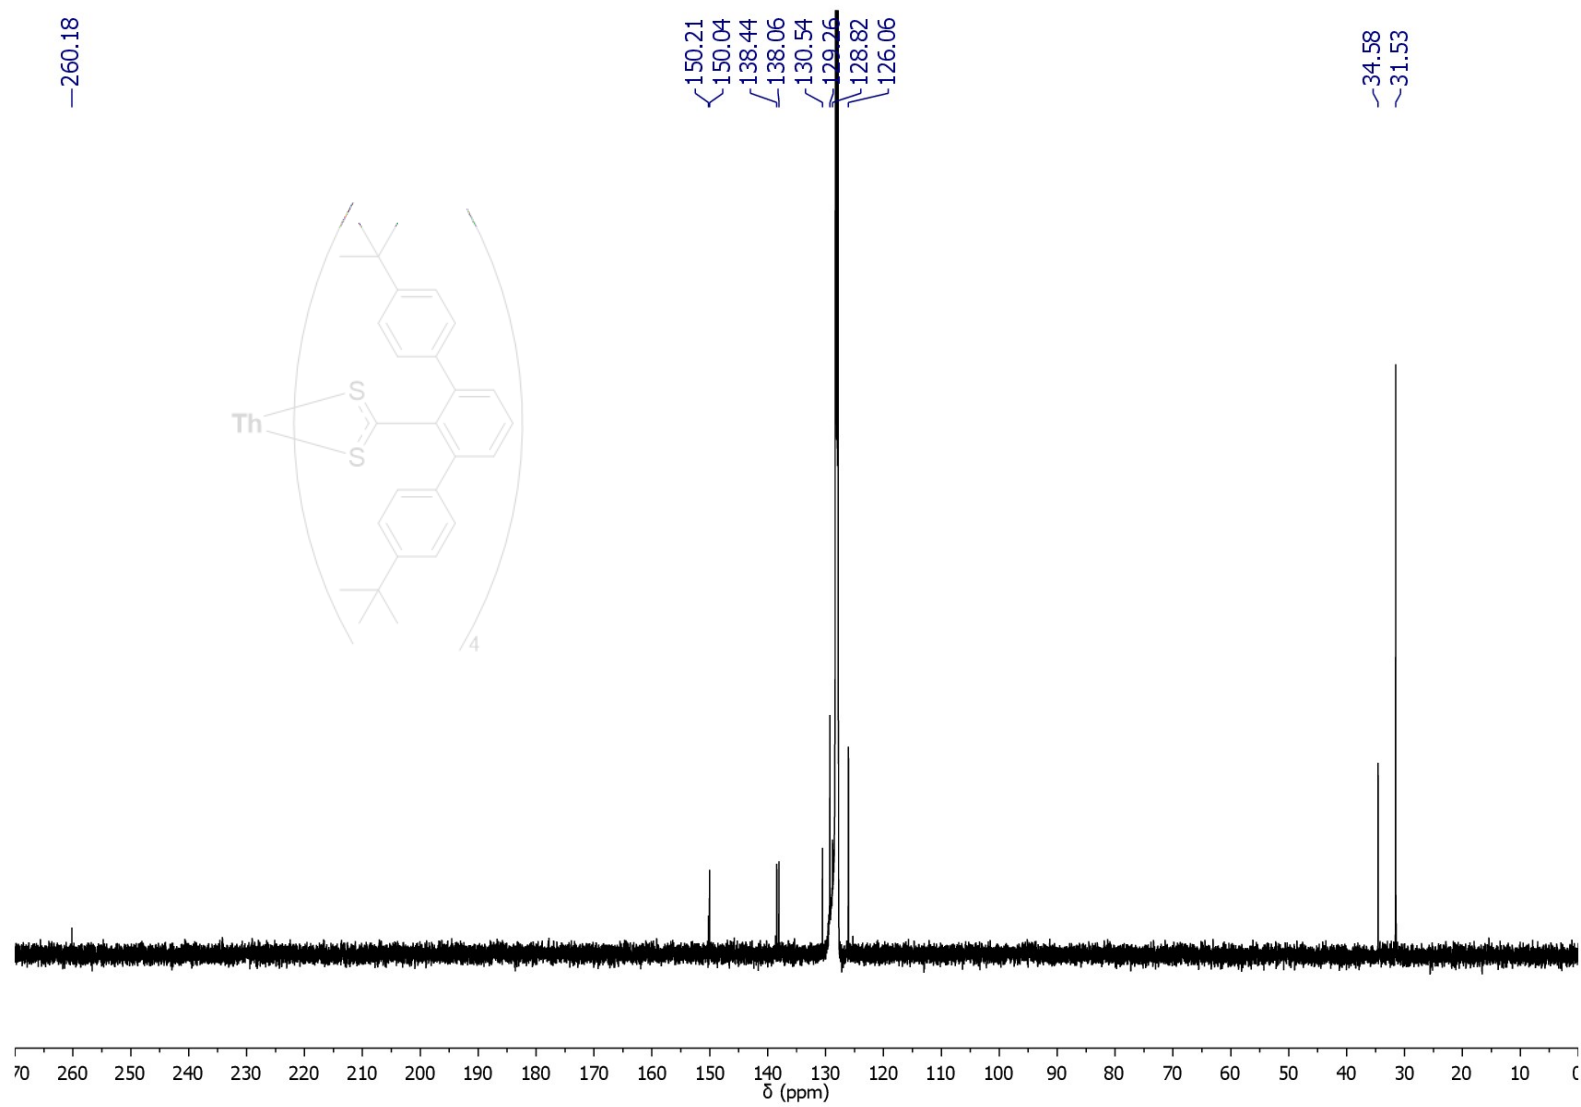

**Figure S12.**  $^{13}\text{C}$  NMR spectrum of **5** in  $\text{C}_6\text{D}_6$

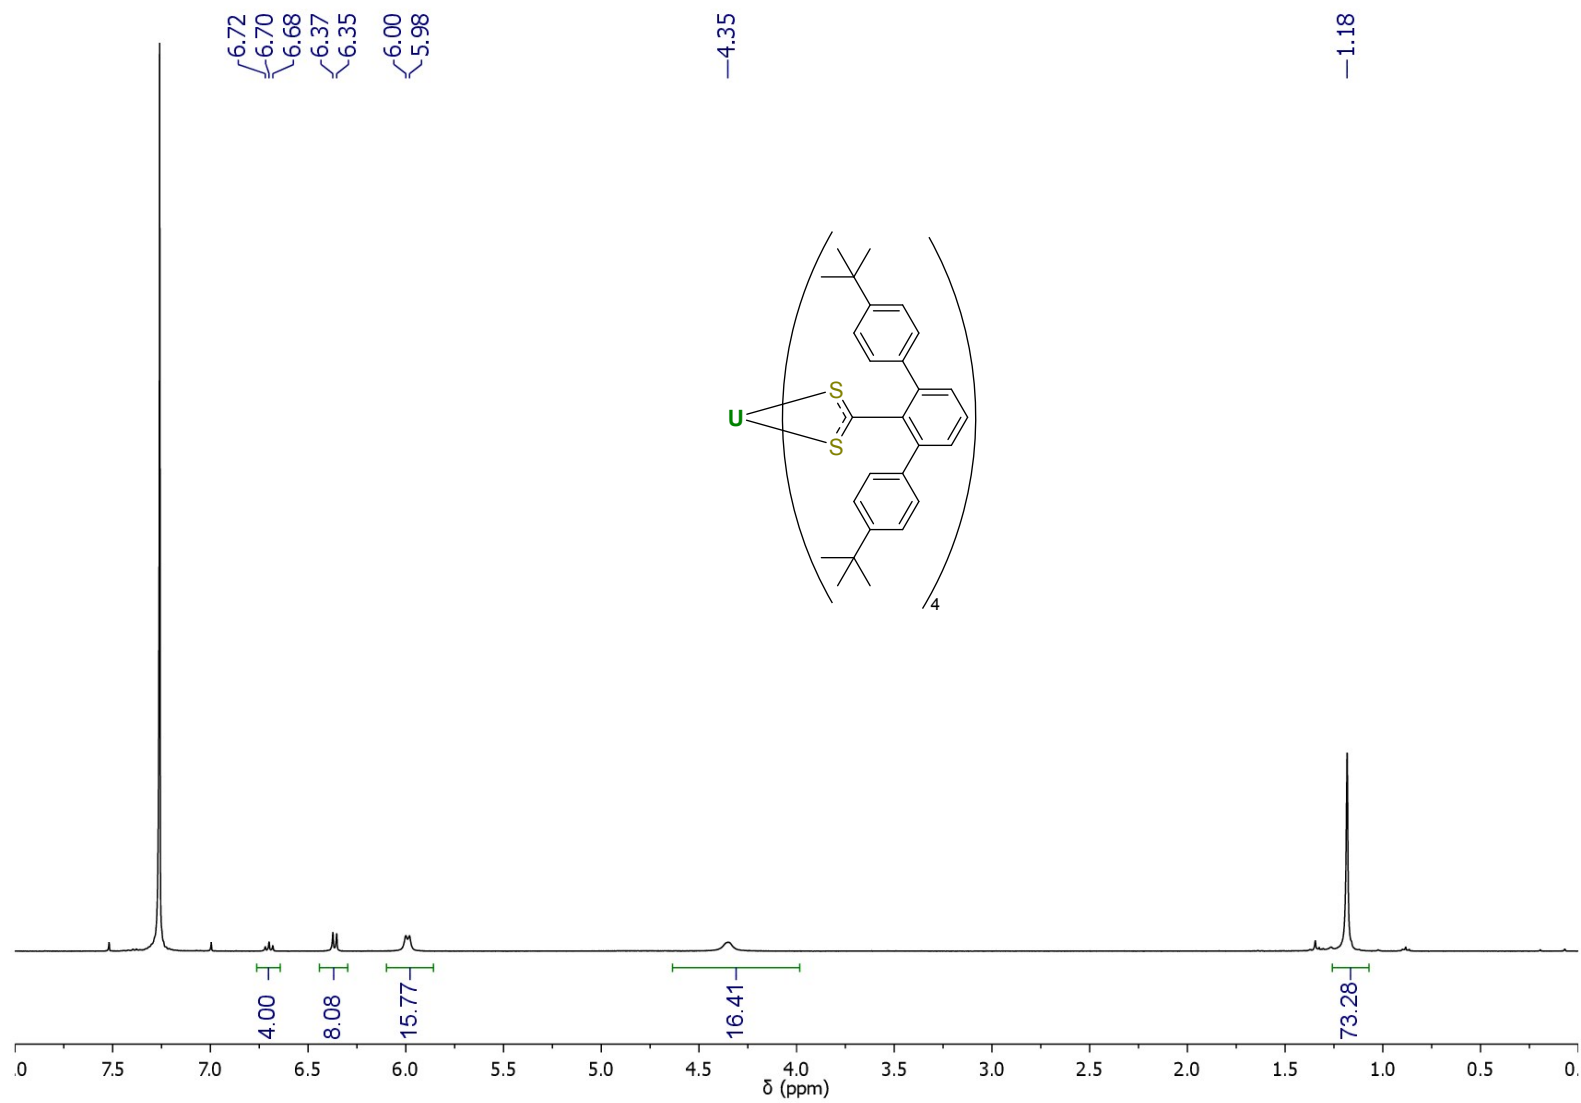

**Figure S13.**  $^1\text{H}$  NMR spectrum of **6** in  $\text{CDCl}_3$

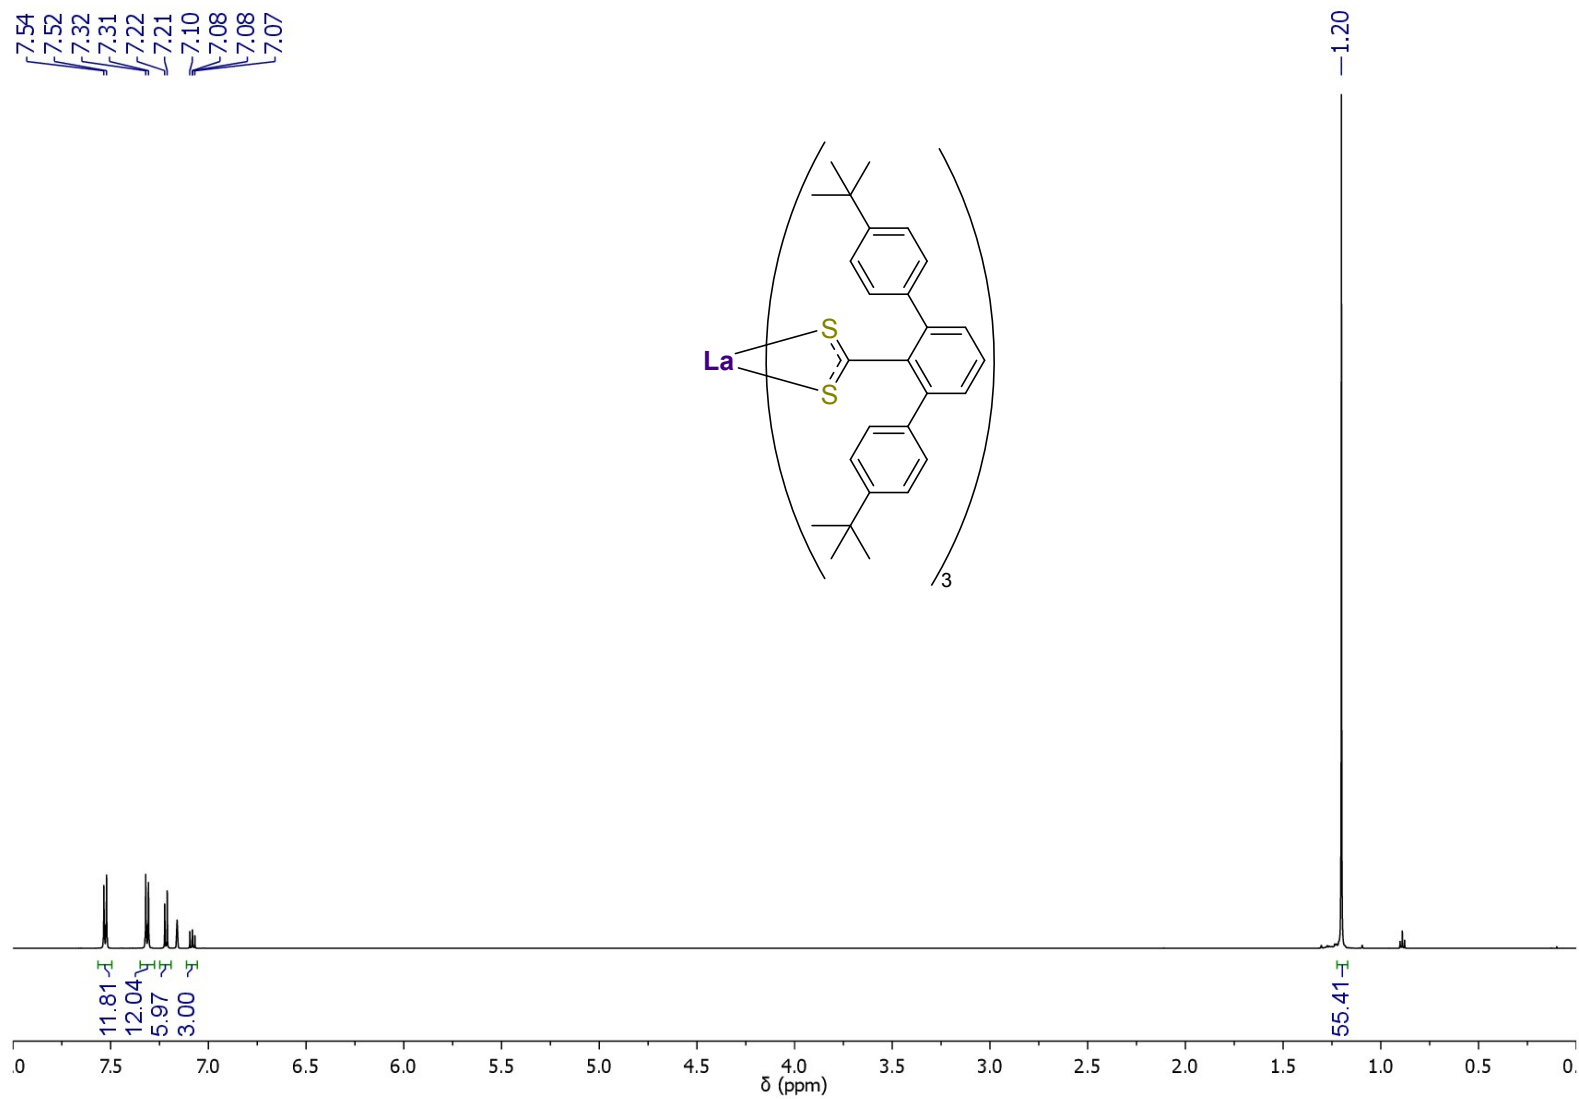

**Figure S14.**  $^1\text{H}$  NMR spectrum of **7** in  $\text{C}_6\text{D}_6$

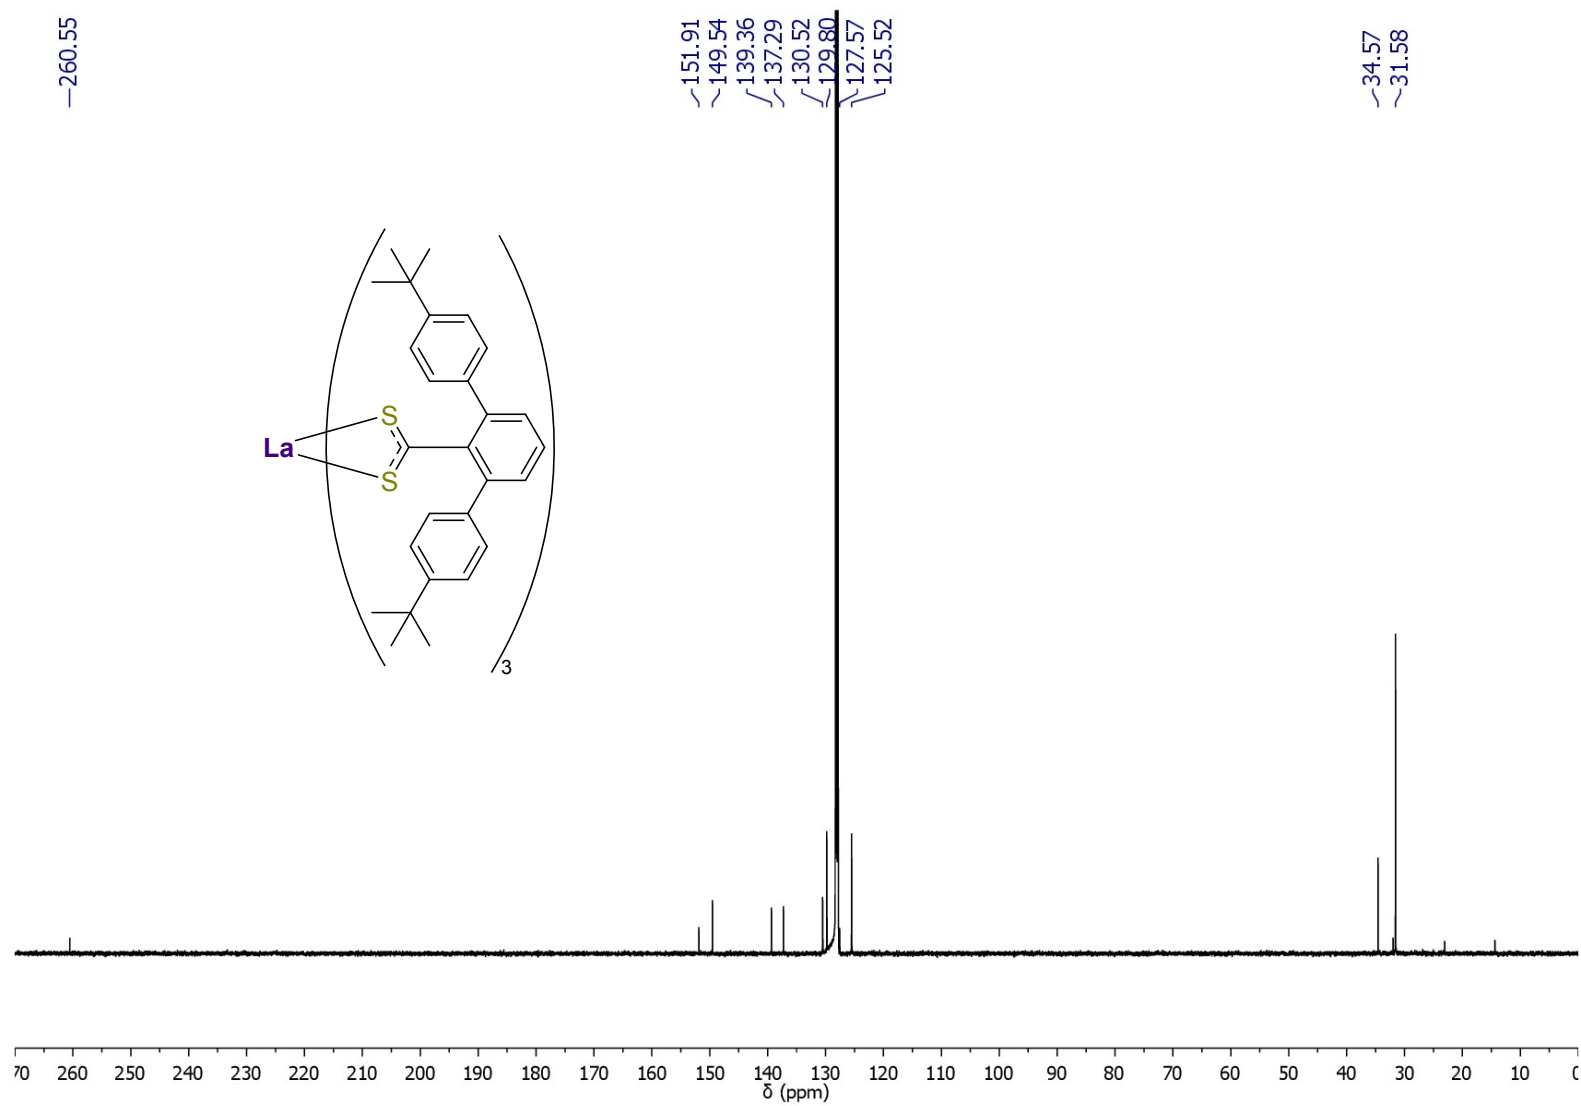

**Figure S15.**  $^{13}\text{C}$  NMR spectrum of **7** in  $\text{C}_6\text{D}_6$



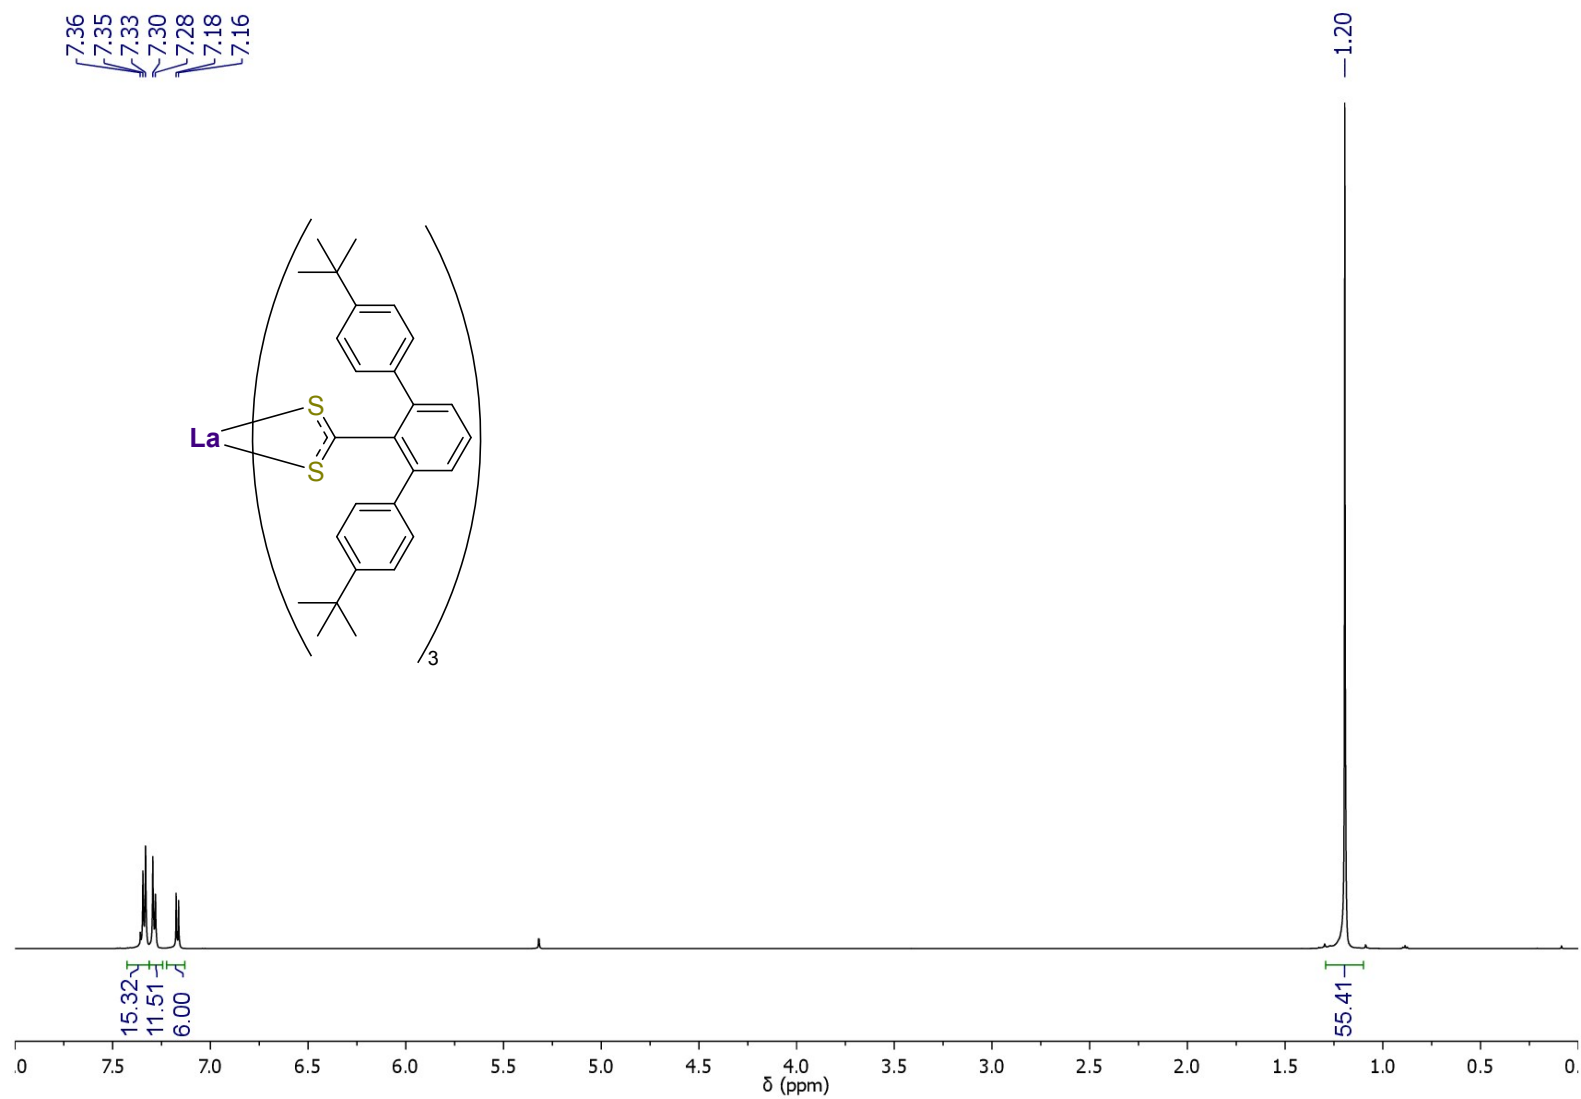

**Figure S16.**  $^1\text{H}$  NMR spectrum of **7** in  $\text{CD}_2\text{Cl}_2$

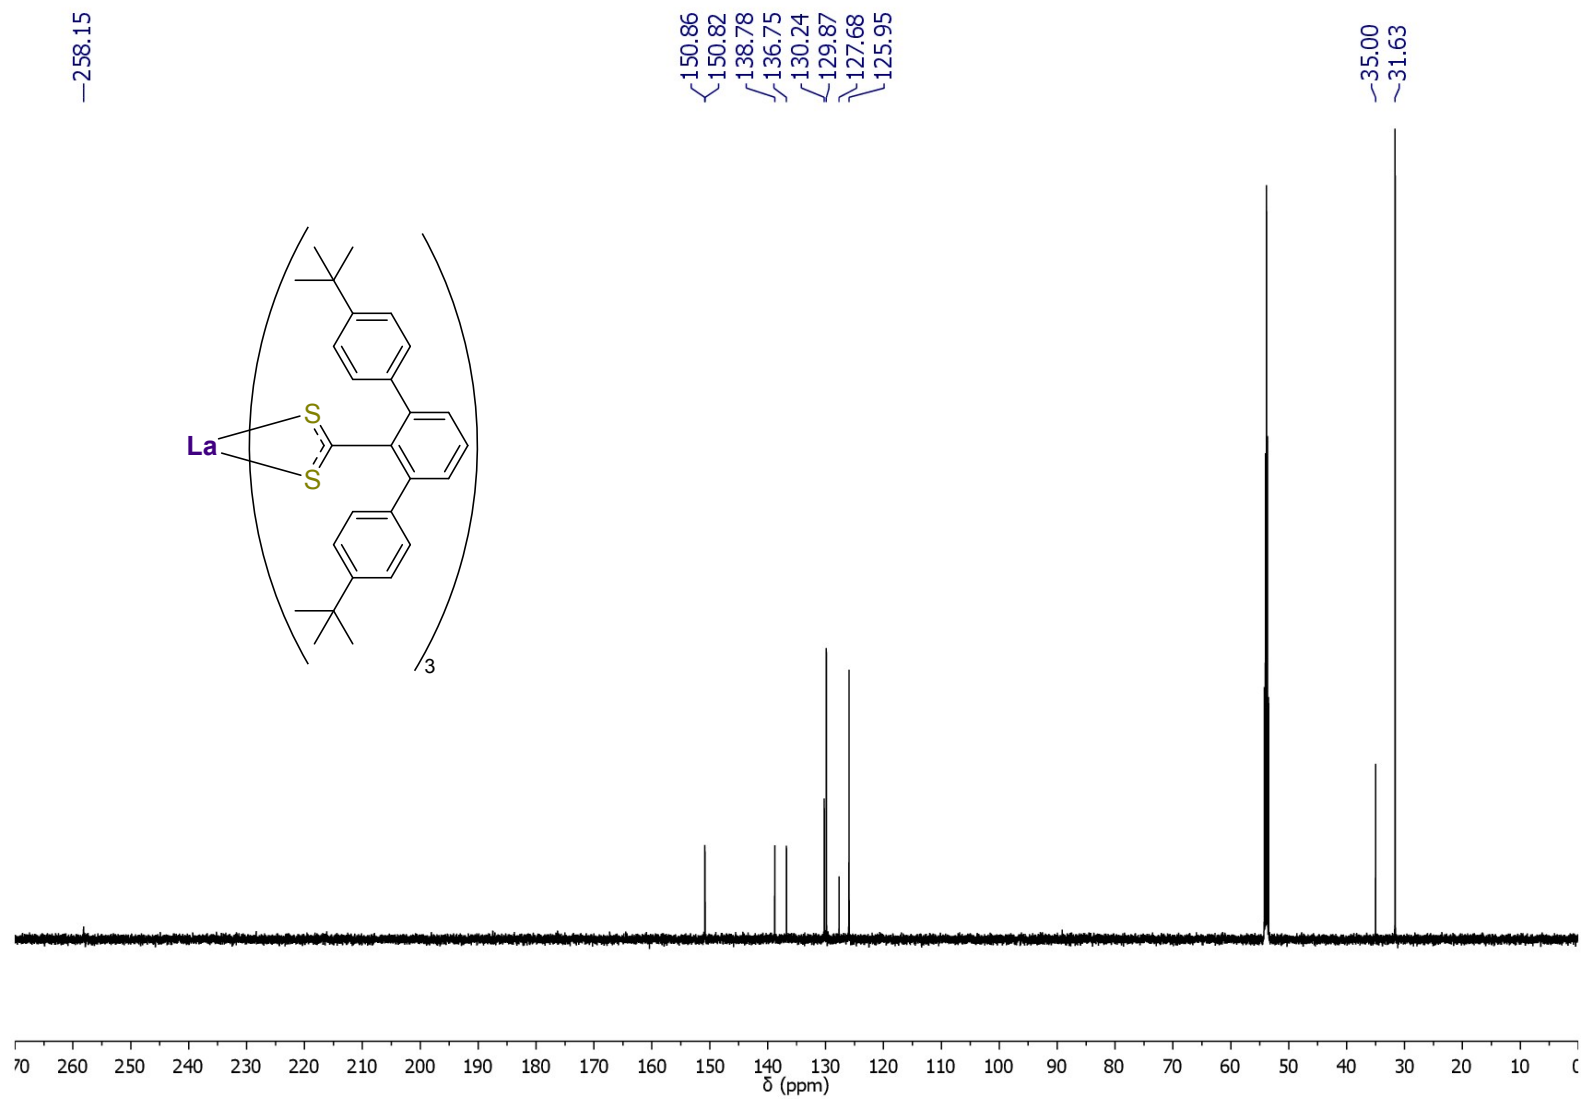

**Figure S17.**  $^{13}\text{C}$  NMR spectrum of **7** in  $\text{CD}_2\text{Cl}_2$

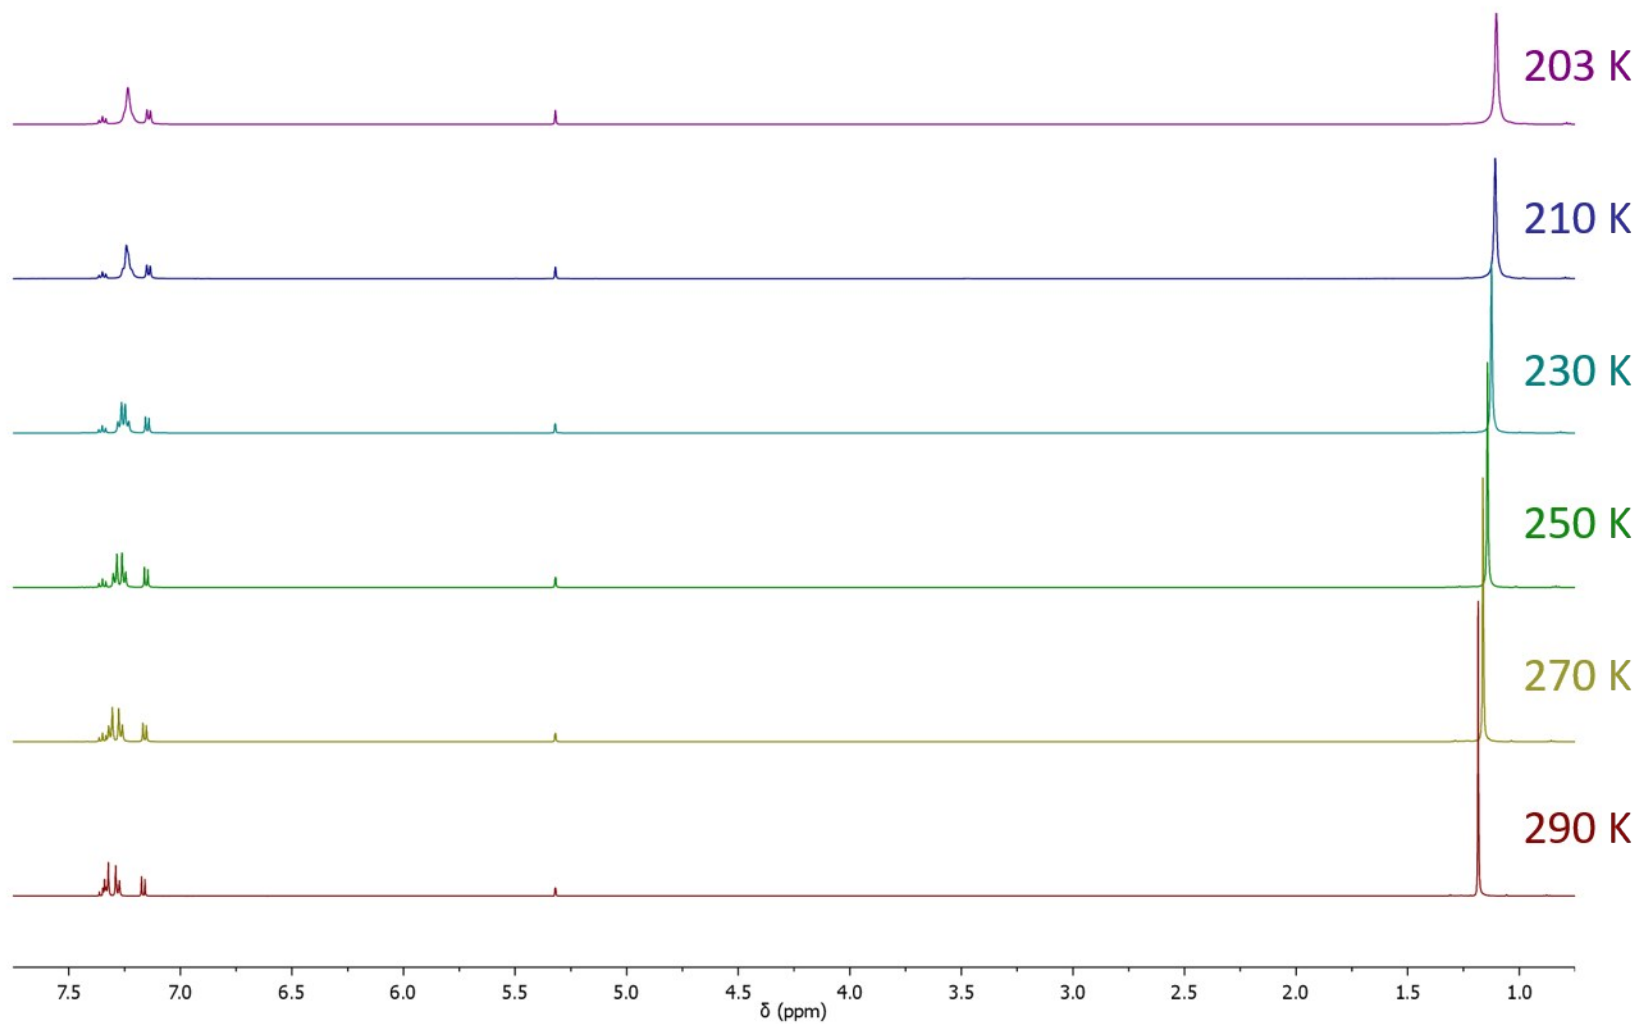

**Figure S18.**  $^1\text{H}$  VT-NMR spectra for **7** in  $\text{CD}_2\text{Cl}_2$  between 203 and 290 K

## Electrochemistry Data

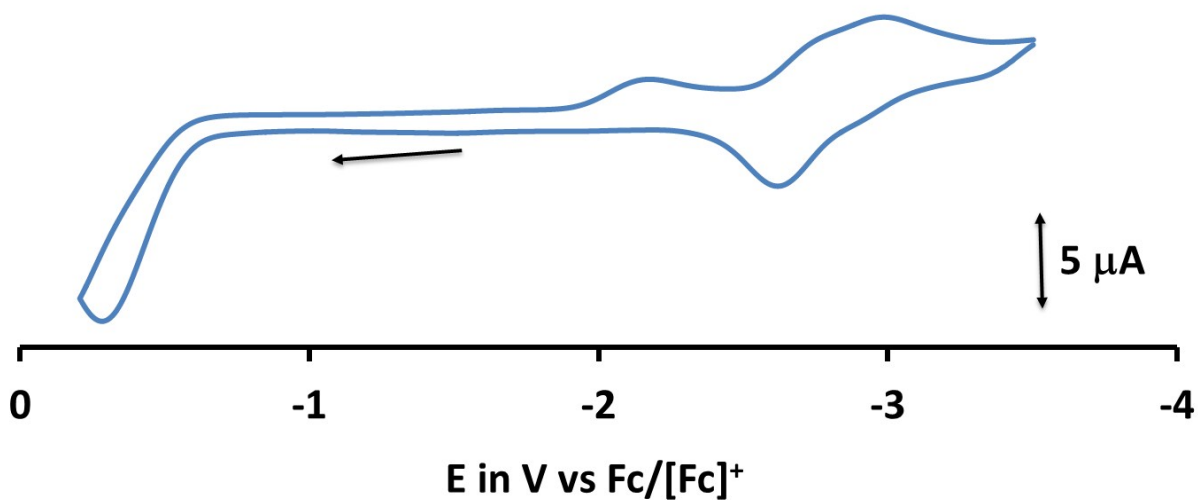

**Figure S19.** Cyclic voltammogram of  $\text{TerphCS}_2\text{K}$  (**4**). Scan rate: 100 mV/s. Analyte concentration: 1 mM.

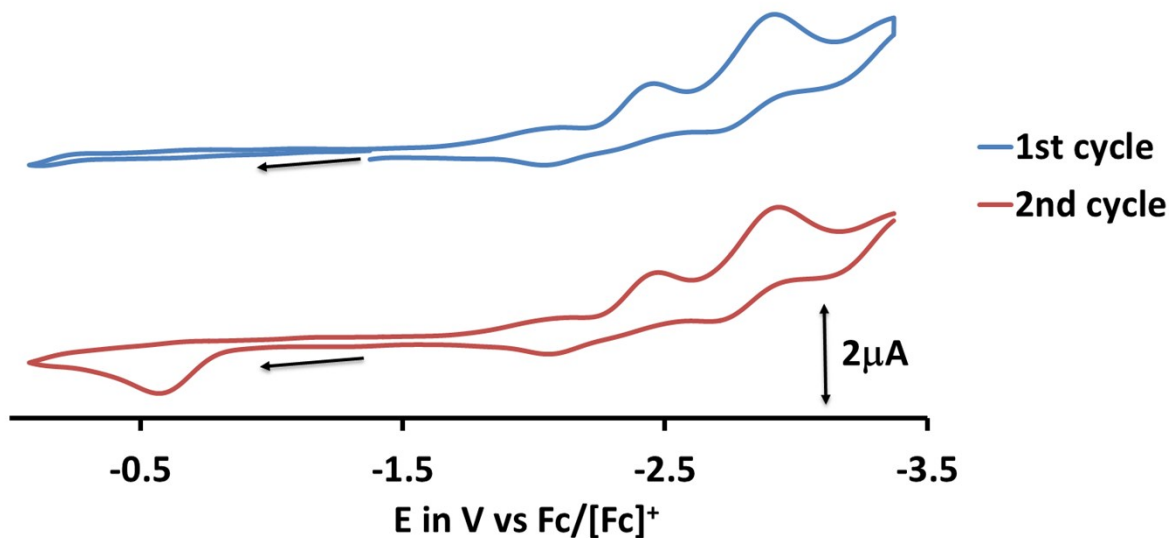

**Figure S20.** Cyclic voltammogram of  $(\text{TerphCS}_2)_4\text{Th}$  (**5**). Scan rate: 100 mV/s. Analyte concentration: 1 mM. The first scan is shown in blue on top, and the second scan is shown in red on the bottom. As observed with for **6**, the oxidation process for **5** occurs from a decay product after the first reduction (see Figs. S21 and S22).

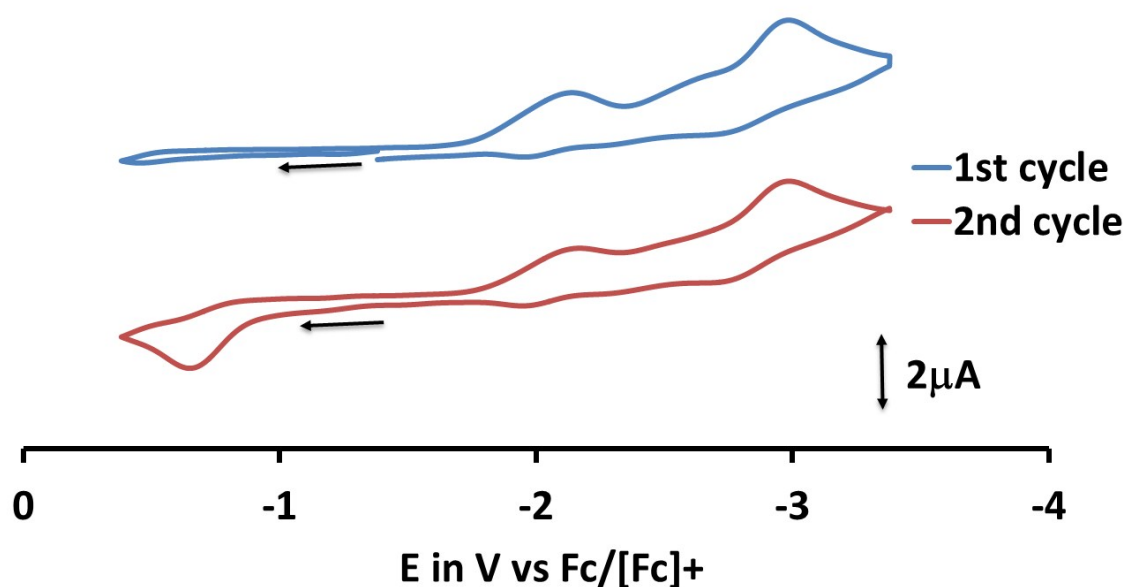

**Figure S21.** Cyclic voltammogram of (TerphCS<sub>2</sub>)<sub>4</sub>U (**6**). Scan rate: 100 mV/s. Analyte concentration: 1 mM. The first scan is shown in blue on top, and the second scan is shown in red on the bottom.

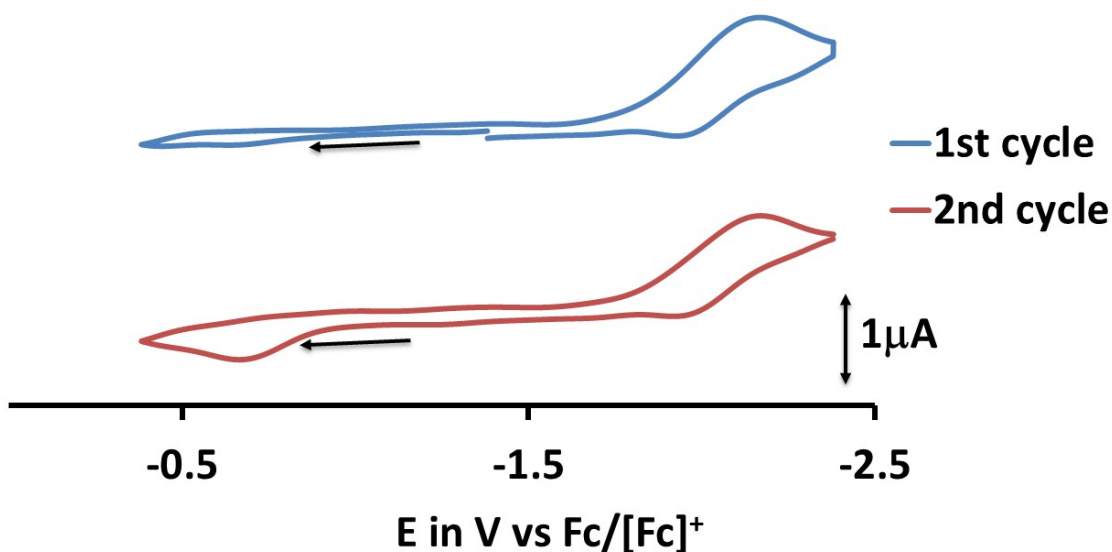

**Figure S22.** Cyclic voltammogram of **6** if only the first reduction is measured showing the oxidation process to occur from a new product forming after the first reduction.

**Table S1.** Observed potentials (in V vs Fc) for the compounds **4**, **5**, and **6**.

| Analyte  | 1 <sup>st</sup> oxidation, E <sub>pa</sub> | 1 <sup>st</sup> reduction, E <sub>pc</sub> | 2 <sup>nd</sup> reduction, E <sub>pc</sub> | 3 <sup>rd</sup> reduction, E <sub>pc</sub> |
|----------|--------------------------------------------|--------------------------------------------|--------------------------------------------|--------------------------------------------|
| <b>4</b> | -0.30                                      | -2.17                                      | -2.73                                      | -2.99                                      |
| <b>5</b> | -0.68*                                     | -2.16                                      | -2.62                                      | -2.99                                      |
| <b>6</b> | -0.59*                                     | -2.08                                      | -2.44                                      | -2.94                                      |

\*only observed in the second cycle

## X-ray Crystallographic Table

**Table S2.** Crystallographic data for (TerphCS<sub>2</sub>)<sub>2</sub> (**3**)

|                                   |                                                 |                   |
|-----------------------------------|-------------------------------------------------|-------------------|
| Identification code               | 3                                               |                   |
| Empirical formula                 | C <sub>54</sub> H <sub>58</sub> S <sub>4</sub>  |                   |
| Formula weight                    | 835.24                                          |                   |
| Temperature                       | 100(2) K                                        |                   |
| Wavelength                        | 0.71073 Å                                       |                   |
| Crystal system                    | Triclinic                                       |                   |
| Space group                       | P -1                                            |                   |
| Unit cell dimensions              | a = 11.8864(6) Å                                | α = 79.6690(10)°. |
|                                   | b = 13.5332(7) Å                                | β = 74.6710(10)°. |
|                                   | c = 17.2923(9) Å                                | γ = 86.6720(10)°. |
| Volume                            | 2639.0(2) Å <sup>3</sup>                        |                   |
| Z                                 | 2                                               |                   |
| Density (calculated)              | 1.051 Mg/m <sup>3</sup>                         |                   |
| Absorption coefficient            | 0.211 mm <sup>-1</sup>                          |                   |
| F(000)                            | 892                                             |                   |
| Crystal size                      | 0.160 × 0.100 × 0.100 mm <sup>3</sup>           |                   |
| Theta range for data collection   | 1.530 to 25.376°.                               |                   |
| Index ranges                      | -14 ≤ h ≤ 14, -16 ≤ k ≤ 15, -20 ≤ l ≤ 20        |                   |
| Reflections collected             | 69116                                           |                   |
| Independent reflections           | 9663 [R(int) = 0.0729]                          |                   |
| Completeness to theta = 25.242°   | 99.9 %                                          |                   |
| Absorption correction             | None                                            |                   |
| Refinement method                 | Full-matrix least-squares on F <sup>2</sup>     |                   |
| Data / restraints / parameters    | 9663 / 0 / 535                                  |                   |
| Goodness-of-fit on F <sup>2</sup> | 1.045                                           |                   |
| Final R indices [I > 2σ(I)]       | R1 = 0.0592, wR2 = 0.1423                       |                   |
| R indices (all data)              | R1 = 0.0909, wR2 = 0.1616                       |                   |
| Extinction coefficient            | n/a                                             |                   |
| Largest diff. peak and hole       | 0.824 and -0.322 e <sup>-</sup> Å <sup>-3</sup> |                   |

**Table S3.** Crystallographic data for (TerphCS<sub>2</sub>)<sub>4</sub>Th(THF) (**5·THF**)

|                                   |                                                                    |                 |
|-----------------------------------|--------------------------------------------------------------------|-----------------|
| Identification code               | 5THF                                                               |                 |
| Empirical formula                 | C <sub>116</sub> H <sub>132</sub> O <sub>2</sub> S <sub>8</sub> Th |                 |
| Formula weight                    | 2046.73                                                            |                 |
| Temperature                       | 100(2) K                                                           |                 |
| Wavelength                        | 0.71073 Å                                                          |                 |
| Crystal system                    | Triclinic                                                          |                 |
| Space group                       | P -1                                                               |                 |
| Unit cell dimensions              | a = 18.3098(10) Å                                                  | α = 74.181(3)°. |
|                                   | b = 18.5236(11) Å                                                  | β = 74.607(3)°. |
|                                   | c = 19.3377(11) Å                                                  | γ = 63.541(3)°. |
| Volume                            | 5569.8(6) Å <sup>3</sup>                                           |                 |
| Z                                 | 2                                                                  |                 |
| Density (calculated)              | 1.220 Mg/m <sup>3</sup>                                            |                 |
| Absorption coefficient            | 1.535 mm <sup>-1</sup>                                             |                 |
| F(000)                            | 2124                                                               |                 |
| Crystal size                      | 0.200 × 0.200 × 0.100 mm <sup>3</sup>                              |                 |
| Theta range for data collection   | 1.110 to 25.474°.                                                  |                 |
| Index ranges                      | -22 ≤ h ≤ 22, -22 ≤ k ≤ 22, -23 ≤ l ≤ 21                           |                 |
| Reflections collected             | 158735                                                             |                 |
| Independent reflections           | 20500 [R(int) = 0.0441]                                            |                 |
| Completeness to theta = 25.000°   | 99.8 %                                                             |                 |
| Absorption correction             | Semi-empirical from equivalents                                    |                 |
| Max. and min. transmission        | 0.5619 and 0.4756                                                  |                 |
| Refinement method                 | Full-matrix least-squares on F <sup>2</sup>                        |                 |
| Data / restraints / parameters    | 20500 / 0 / 1168                                                   |                 |
| Goodness-of-fit on F <sup>2</sup> | 1.081                                                              |                 |
| Final R indices [I > 2σ(I)]       | R1 = 0.0379, wR2 = 0.0935                                          |                 |
| R indices (all data)              | R1 = 0.0434, wR2 = 0.0966                                          |                 |
| Extinction coefficient            | n/a                                                                |                 |
| Largest diff. peak and hole       | 2.810 and -1.133 e <sup>-</sup> Å <sup>-3</sup>                    |                 |

**Table S4.** Crystallographic data for (TerphCS<sub>2</sub>)<sub>4</sub>U (**6**)

|                                   |                                                                  |                 |
|-----------------------------------|------------------------------------------------------------------|-----------------|
| Identification code               | 6                                                                |                 |
| Empirical formula                 | C <sub>216</sub> H <sub>232</sub> S <sub>16</sub> U <sub>2</sub> |                 |
| Formula weight                    | 3817.02                                                          |                 |
| Temperature                       | 100(2) K                                                         |                 |
| Wavelength                        | 0.71073 Å                                                        |                 |
| Crystal system                    | Triclinic                                                        |                 |
| Space group                       | P -1                                                             |                 |
| Unit cell dimensions              | a = 17.6450(7) Å                                                 | α = 82.843(2)°. |
|                                   | b = 20.5248(8) Å                                                 | β = 88.847(2)°. |
|                                   | c = 28.1239(10) Å                                                | γ = 70.436(2)°. |
| Volume                            | 9520.0(6) Å <sup>3</sup>                                         |                 |
| Z                                 | 2                                                                |                 |
| Density (calculated)              | 1.332 Mg/m <sup>3</sup>                                          |                 |
| Absorption coefficient            | 1.927 mm <sup>-1</sup>                                           |                 |
| F(000)                            | 3936                                                             |                 |
| Crystal size                      | 0.100 × 0.050 × 0.020 mm <sup>3</sup>                            |                 |
| Theta range for data collection   | 1.061 to 25.432°.                                                |                 |
| Index ranges                      | -20 ≤ h ≤ 21, -24 ≤ k ≤ 24, -33 ≤ l ≤ 33                         |                 |
| Reflections collected             | 152007                                                           |                 |
| Independent reflections           | 35027 [R(int) = 0.0590]                                          |                 |
| Completeness to theta = 25.000°   | 99.8 %                                                           |                 |
| Absorption correction             | Semi-empirical from equivalents                                  |                 |
| Max. and min. transmission        | 0.7452 and 0.6154                                                |                 |
| Refinement method                 | Full-matrix least-squares on F <sup>2</sup>                      |                 |
| Data / restraints / parameters    | 35027 / 48 / 2185                                                |                 |
| Goodness-of-fit on F <sup>2</sup> | 1.066                                                            |                 |
| Final R indices [I > 2σ(I)]       | R1 = 0.0682, wR2 = 0.1683                                        |                 |
| R indices (all data)              | R1 = 0.1089, wR2 = 0.1958                                        |                 |
| Extinction coefficient            | n/a                                                              |                 |
| Largest diff. peak and hole       | 6.928 and -2.147 e <sup>-</sup> Å <sup>-3</sup>                  |                 |



**Table S5.** Crystallographic data for (TerphCS<sub>2</sub>)<sub>3</sub>La (7)

|                                   |                                                                   |                  |
|-----------------------------------|-------------------------------------------------------------------|------------------|
| Identification code               | 7                                                                 |                  |
| Empirical formula                 | C <sub>83</sub> H <sub>91</sub> Cl <sub>4</sub> La S <sub>6</sub> |                  |
| Formula weight                    | 1561.62                                                           |                  |
| Temperature                       | 100(2) K                                                          |                  |
| Wavelength                        | 0.71073 Å                                                         |                  |
| Crystal system                    | Monoclinic                                                        |                  |
| Space group                       | C 2/c                                                             |                  |
| Unit cell dimensions              | a = 20.1124(13) Å                                                 | α = 90°.         |
|                                   | b = 25.4125(16) Å                                                 | β = 120.118(3)°. |
|                                   | c = 17.7928(11) Å                                                 | γ = 90°.         |
| Volume                            | 7866.3(9) Å <sup>3</sup>                                          |                  |
| Z                                 | 4                                                                 |                  |
| Density (calculated)              | 1.319 Mg/m <sup>3</sup>                                           |                  |
| Absorption coefficient            | 0.880 mm <sup>-1</sup>                                            |                  |
| F(000)                            | 3240                                                              |                  |
| Crystal size                      | 0.130 × 0.040 × 0.030 mm <sup>3</sup>                             |                  |
| Theta range for data collection   | 1.418 to 28.375°.                                                 |                  |
| Index ranges                      | -26 ≤ h ≤ 26, -33 ≤ k ≤ 33, -23 ≤ l ≤ 23                          |                  |
| Reflections collected             | 131732                                                            |                  |
| Independent reflections           | 9834 [R(int) = 0.0467]                                            |                  |
| Completeness to theta = 28.000°   | 100.0 %                                                           |                  |
| Absorption correction             | Semi-empirical from equivalents                                   |                  |
| Max. and min. transmission        | 0.6471 and 0.5543                                                 |                  |
| Refinement method                 | Full-matrix least-squares on F <sup>2</sup>                       |                  |
| Data / restraints / parameters    | 9834 / 0 / 435                                                    |                  |
| Goodness-of-fit on F <sup>2</sup> | 1.057                                                             |                  |
| Final R indices [I > 2σ(I)]       | R1 = 0.0412, wR2 = 0.0976                                         |                  |
| R indices (all data)              | R1 = 0.0503, wR2 = 0.1031                                         |                  |
| Extinction coefficient            | n/a                                                               |                  |
| Largest diff. peak and hole       | 1.672 and -0.936 e <sup>-</sup> Å <sup>-3</sup>                   |                  |

**Table S6.** Crystallographic data for (TerphCS<sub>2</sub>)<sub>3</sub>La (**7·tol**)

|                                   |                                                    |                 |
|-----------------------------------|----------------------------------------------------|-----------------|
| Identification code               | 7tol                                               |                 |
| Empirical formula                 | C <sub>95</sub> H <sub>103</sub> La S <sub>6</sub> |                 |
| Formula weight                    | 1576.04                                            |                 |
| Temperature                       | 100(2) K                                           |                 |
| Wavelength                        | 0.71073 Å                                          |                 |
| Crystal system                    | Triclinic                                          |                 |
| Space group                       | P -1                                               |                 |
| Unit cell dimensions              | a = 14.1644(8) Å                                   | α = 77.987(3)°. |
|                                   | b = 15.2313(8) Å                                   | β = 70.849(3)°. |
|                                   | c = 21.2845(12) Å                                  | γ = 75.738(2)°. |
| Volume                            | 4163.3(4) Å <sup>3</sup>                           |                 |
| Z                                 | 2                                                  |                 |
| Density (calculated)              | 1.257 Mg/m <sup>3</sup>                            |                 |
| Absorption coefficient            | 0.709 mm <sup>-1</sup>                             |                 |
| F(000)                            | 1652                                               |                 |
| Crystal size                      | 0.120 × 0.080 × 0.070 mm <sup>3</sup>              |                 |
| Theta range for data collection   | 1.393 to 25.441°.                                  |                 |
| Index ranges                      | -17 ≤ h ≤ 17, -18 ≤ k ≤ 18, -25 ≤ l ≤ 25           |                 |
| Reflections collected             | 66065                                              |                 |
| Independent reflections           | 15364 [R(int) = 0.0347]                            |                 |
| Completeness to theta = 25.000°   | 100.0 %                                            |                 |
| Absorption correction             | Semi-empirical from equivalents                    |                 |
| Max. and min. transmission        | 0.7452 and 0.7022                                  |                 |
| Refinement method                 | Full-matrix least-squares on F <sup>2</sup>        |                 |
| Data / restraints / parameters    | 15364 / 0 / 939                                    |                 |
| Goodness-of-fit on F <sup>2</sup> | 1.046                                              |                 |
| Final R indices [I > 2σ(I)]       | R1 = 0.0396, wR2 = 0.1037                          |                 |
| R indices (all data)              | R1 = 0.0437, wR2 = 0.1062                          |                 |
| Extinction coefficient            | n/a                                                |                 |
| Largest diff. peak and hole       | 1.734 and -0.796 e <sup>-</sup> Å <sup>-3</sup>    |                 |
